1 **Differential response of macrophages and neutrophils to**  
2 **trypanosome infections in zebrafish: occurrence of foamy**  
3 **macrophages**

4  
5  
6  
7  
8  
9

Sem H. Jacobs<sup>1,2</sup>, Éva Dóró<sup>1,\*</sup>, Ffion R. Hammond<sup>1,#</sup>, Mai E. Nguyen- Chi<sup>3</sup>, Georges Lutfalla<sup>3</sup>, Geert F. Wiegertjes<sup>1,4</sup>, Maria Forlenza<sup>1,\$</sup>

10 <sup>1</sup> Cell Biology and Immunology Group, Department of Animal Sciences, Wageningen University &  
11 Research, Wageningen, The Netherlands

12 <sup>2</sup> Experimental Zoology Group, Department of Animal Sciences, Wageningen University & Research,  
13 Wageningen, The Netherlands

14 <sup>3</sup> DIMNP, CNRS, University of Montpellier, Montpellier, France

15 <sup>4</sup> Aquaculture and Fisheries Group, Department of Animal Sciences, Wageningen University &  
16 Research, Wageningen, The Netherlands

17  
18  
19  
20

21 \* current address: Institute of Physiology, Faculty of Medicine, University of Pécs, Pécs, Hungary

22 # current address: Department of Infection, Immunity & Cardiovascular Disease, University of  
23 Sheffield, Sheffield, United Kingdom

24  
25

\$: correspondence should be addressed to: [maria.forlenza@wur.nl](mailto:maria.forlenza@wur.nl)

26 **Abstract**

27

28 A tightly regulated innate immune response to trypanosome infections is critical to strike  
29 a balance between parasite control and inflammation-associated pathology. In the present  
30 study, we make use of the recently established *Trypanosoma carassii* infection model in  
31 larval zebrafish to study the early response of macrophages and neutrophils to  
32 trypanosome infections *in vivo*. We consistently identified high- and low-infected  
33 individuals and were able to simultaneously characterize their differential innate response.  
34 Not only did macrophage and neutrophil number and distribution differ between the two  
35 groups, but also macrophage morphology and activation state. Exclusive to high-infected  
36 zebrafish, was the appearance of macrophages rich in lipid droplets, confirmed to be foamy  
37 macrophages and characterized by a strong pro-inflammatory profile. Altogether, we  
38 provide an *in vivo* characterization of the differential response of macrophage and  
39 neutrophil to trypanosome infection and identify foamy macrophages as potentially  
40 associated with an exacerbated immune response and susceptibility to the infection. To  
41 our knowledge this is the first report of the occurrence of foamy macrophages during an  
42 extracellular trypanosome infection.

## 43 **Introduction**

44

45 Trypanosomes of the *Trypanosoma* genus are protozoan haemoflagellates that can infect  
46 animals from all vertebrate classes, including warm-blooded mammals and birds as well  
47 as cold-blooded amphibians, reptiles and fish. This genus contains human and animal  
48 pathogens, including the intracellular *Trypanosoma cruzi* (causing Human American  
49 Trypanosomiasis or Chagas' disease), the extracellular *T. brucei rhodesiense* and *T. brucei*  
50 *gambiense* (causing Human African Trypanosomiasis or Sleeping Sickness) and *T.*  
51 *congolense*, *T. vivax* and *T. b. brucei* (causing Animal African Trypanosomiasis or Nagana)  
52 (Radwanska et al., 2018; Simpson et al., 2006). Among these, salivarian trypanosomes  
53 such as *T. brucei* ssp. live extracellularly in the bloodstream or tissue fluids of their host.  
54 For example, *T. vivax* can multiply rapidly and is evenly distributed throughout the  
55 cardiovascular system, *T. congolense* tends to aggregate in small blood vessels, whereas  
56 *T. brucei* especially can extravasate and multiply in interstitial tissues (reviewed by Magez  
57 and Caljon, 2011). Pathologically, anaemia appears to be a factor common to infections  
58 with most if not all trypanosomes although with different underlying causative  
59 mechanisms. These include, among others, erythrophagocytosis by macrophages (Cnops  
60 et al., 2015; Guegan et al., 2013), hemodilution (Naessens, 2006), erythrolysis through  
61 intermembrane transfer of variant surface glycoprotein (VSG) from trypanosomes to  
62 erythrocytes (Rifkin and Landsberger, 1990), oxidative stress from free radicals (Mishra et  
63 al., 2017) and mechanical damage through direct interaction of trypanosomes with  
64 erythrocytes surface (Boada-Sucre et al., 2016).

65 Immunologically, infections with trypanosomes are often associated with dysfunction and  
66 pathology related to exacerbated innate and adaptive immune responses (reviewed by  
67 Radwanska et al., 2018; Stijlemans et al., 2016). Initially it was believed that antibody-  
68 dependent complement-mediated lysis was the major protective mechanism involved in  
69 early parasite control (Krettli et al., 1979; Musoke and Barbet, 1977). However, later  
70 studies revealed that at low antibody levels, trypanosomes can efficiently remove surface-  
71 bound antibodies through an endocytosis-mediated mechanisms (Engstler et al., 2007),  
72 and that complement C5-deficient mice are able to control the first-peak parasitaemia  
73 similarly to wild type mice (La Greca et al., 2014). Instead, innate immune mediators such  
74 as IFN $\gamma$ , TNF $\alpha$  and nitric oxide (NO) were shown to be indispensable for the control of first-  
75 peak parasitaemia, through direct and indirect mechanisms (reviewed by Radwanska et  
76 al., 2018). In the early phase of infection, the timely induction of IFN $\gamma$  by NK, NKT and  
77 CD8 $^{+}$  cells (Cnops et al., 2015) followed by the production of TNF $\alpha$  and NO by IFN $\gamma$ -primed  
78 macrophages (Baral et al., 2007; Iraqi et al., 2001; Lopez et al., 2008; Rudolf Lucas et al.,  
79 1994; Magez et al., 1993, 2007, 2006, 2001, 1999; O'Gorman et al., 2006; Sternberg and  
80 Mabbott, 1996; Wu et al., 2017) leads to effective control of first-peak parasitaemia.

Macrophages and neutrophils response to trypanosome infections in zebrafish

81 Glycosyl-inositol-phosphate soluble variant surface glycoproteins (GPI-VSG) released from  
82 the surface of trypanosomes were found to be the major inducers of TNF $\alpha$  in macrophages,  
83 and that such response could be primed by IFN $\gamma$  (Coller et al., 2003; Magez et al., 2002).  
84 When macrophages would encounter GPI-VSG prior to IFN $\gamma$  exposure however, their TNF $\alpha$   
85 and NO response would dramatically be reduced (Coller et al., 2003) which, depending on  
86 the timing, could either lead to macrophage unresponsiveness or prevent exacerbated  
87 inflammatory responses during the first-peak of parasite clearance. Altogether, these data  
88 made clear that an early innate immune response is crucial to control the acute phase of  
89 trypanosome infection, but that its tight regulation is critical to ensure parasite control as  
90 opposed to pathology.

91 All the findings above took advantage of the availability of several mice models for  
92 trypanosome infection using trypanosusceptible or trypanotolerant as well as mutant  
93 'knock-out' mice strains. Although mice cannot be considered natural hosts of  
94 trypanosomes and do not always recapitulate all features of natural infections, the  
95 availability of such models allowed to gain insights into the general biology of  
96 trypanosomes, their interaction with and evasion of the host immune system, as well as  
97 into various aspects related to vaccine failure, antigenic variation, and (uncontrolled)  
98 inflammation (Magez and Caljon, 2011). The use of knock-out strains for example, shed  
99 specific light on the role of various cytokines, particularly TNF $\alpha$ , IFN $\gamma$  and IL-10, in the  
100 control of parasitaemia and in the induction of pathological conditions during infection  
101 (reviewed in Magez and Caljon, 2011). It would be ideal to be able to follow, *in vivo*, the  
102 early host responses to the infection and visualise the trypanosome response to the host's  
103 attack. However, due to the lack of transparency of most mammalian hosts, this has not  
104 yet been feasible.

105 We recently reported the establishment of an experimental trypanosome infection of  
106 zebrafish (*Danio rerio*) with the fish-specific trypanosome *Trypanosoma carassii* (Dóro et  
107 al., 2019). In the latter study, by combining *T. carassii* infection of transparent zebrafish  
108 with high-resolution high-speed microscopy, we were able to describe in detail the  
109 swimming behaviour of trypanosomes *in vivo*, in the natural environment of blood and  
110 tissues of a live vertebrate host. This led to the discovery of novel attachment mechanisms  
111 as well as trypanosome swimming behaviours that otherwise would not have been  
112 observed *in vitro* (Dóro et al., 2019). Previous studies in common carp (*Cyprinus carpio*),  
113 goldfish (*Carrassius aurata*) and more recently zebrafish, demonstrated that infections with  
114 *T. carassii* present many of the pathological features observed during human or animal  
115 trypanosomiasis, including a pro-inflammatory response during first-peak parasitaemia  
116 (Kovacevic et al., 2015; Oladiran et al., 2011; Oladiran and Belosevic, 2009) polyclonal B  
117 and T cell activation (Joerink et al., 2007, 2004; Lischke et al., 2000; Ribeiro et al., 2010;  
118 Woo and Ardelli, 2014) and anaemia (Dóro et al., 2019; Islam and Woo, 1991; McAllister

Macrophages and neutrophils response to trypanosome infections in zebrafish

119 et al., 2019). These shared features among human and animal (including fish)  
120 trypanosomiases suggest a commonality in (innate) immune responses to trypanosomes  
121 across different vertebrates.

122 Zebrafish are fresh water cyprinid fish closely related to many of the natural hosts of *T.*  
123 *carassii* (Kent et al., 1993; Simpson et al., 2006) and are a powerful model species owing  
124 to, among others, their genetic tractability, large number of transgenic lines marking  
125 several immune cell types, knock-out mutant lines and most importantly, the transparency  
126 of developing embryos allowing high-resolution *in vivo* visualisation of cell behaviour  
127 (Benard et al., 2015; Bertrand et al., 2010; Ellett et al., 2011; Langenau et al., 2004;  
128 Lawson and Weinstein, 2002; Page et al., 2013; Petrie-Hanson et al., 2009; Renshaw et  
129 al., 2006; White et al., 2008). During the first 2-3 weeks of development, zebrafish are  
130 devoid of mature T and B lymphocytes and thus offer a window of opportunity to study  
131 innate immune responses (Torraca et al., 2014; Torraca and Mostowy, 2018), especially  
132 those driven by neutrophils and macrophages. The response of macrophages and  
133 neutrophilic granulocytes towards several viral, fungal and bacterial pathogens has been  
134 studied in detail using zebrafish (Cronan and Tobin, 2014; García-Valtanen et al., 2017;  
135 Nguyen-Chi et al., 2014a; Palha et al., 2013; Ramakrishnan, 2013; Renshaw and Trede,  
136 2012; Rosowski et al., 2018; Torraca and Mostowy, 2018) but never before in the context  
137 of trypanosome infections.

138 Taking advantage of the recently established zebrafish-*T. carassii* infection model and of  
139 the availability of zebrafish transgenic lines marking macrophages and neutrophils as well  
140 as *il1b*- and *tnfa*-expressing cells, in the current study, we describe the early events of the  
141 innate immune response of zebrafish to *T. carassii* infections. Based on a novel clinical  
142 scoring system relying, amongst other criteria, on *in vivo* real-time monitoring of  
143 parasitaemia, we could consistently segregate larvae in high- and low-infected individuals  
144 without having to sacrifice the larvae. Between these individuals we always observed a  
145 marked differential response between macrophages and neutrophils, especially with  
146 respect to their proliferative capacity and redistribution in tissues or major blood vessels  
147 during infection. Significant differences were observed in the inflammatory response of  
148 macrophages in high- and low-infected individuals and in their susceptibility to the  
149 infection. In low-infected individuals, despite an early increase in macrophage number, a  
150 mild inflammatory response strongly associated with control of parasitaemia and survival  
151 to the infection was observed. Conversely, exclusively in high-infected individuals, we  
152 describe the occurrence of large, granular macrophages, reminiscent of foamy  
153 macrophages (Vallochi et al., 2018), characterized by a strong inflammatory profile and  
154 association to susceptibility to the infection. This is the first report of the occurrence of  
155 foamy macrophages during an extracellular trypanosome infection.

## 156 **Materials and methods**

157

### 158 **Zebrafish lines and maintenance**

159 Zebrafish were kept and handled according to the Zebrafish Book (zfin.org) and local  
160 animal welfare regulations of The Netherlands. Zebrafish embryo and larvae were raised  
161 in egg water (0.6 g/L sea salt, Sera Marin, Heinsberg, Germany) at 27°C with a 12:12  
162 light-dark cycle. From 5 days post fertilisation (dpf) until 14 dpf larvae were fed  
163 Tetrahymena once a day. From 10 dpf larvae were also daily fed dry food ZM-100 (ZM  
164 systems, UK). The following zebrafish lines used in this study: transgenic *Tg(mpx:GFP)<sup>114</sup>*  
165 (Renshaw et al., 2006), *Tg(kdrl:hras-mCherry)<sup>s896</sup>* referred as *Tg(kdrl:caax-mCherry)* (Chi  
166 et al., 2008), *Tg(fli1:eGFP)<sup>v1</sup>* (Lawson and Weinstein, 2002), *Tg(mpeg1:eGFP)<sup>g122</sup>* (Ellett et  
167 al., 2011), *Tg(mpeg1.4:mCherry-F)<sup>ump2Tg</sup>*, *Tg(il1b:eGFP-F)<sup>ump3Tg</sup>*, (Nguyen-Chi et al.,  
168 2014b), *Tg(tnfa:eGFP-F)<sup>ump5Tg</sup>* (Nguyen-Chi et al., 2015) or crosses thereof. The latter  
169 three transgenic zebrafish lines express a farnesylated (membrane-bound) mCherry  
170 (mCherry-F) or eGFP (eGFP-F) under the control of the *mpeg1*, *il1b* or *tnfa* promoter,  
171 respectively.

### 172 **Trypanosoma carassii culture and infection of zebrafish larvae**

173 *Trypanosoma carassii* (strain TsCc-NEM) was cloned and characterized previously (Overath  
174 et al., 1998) and maintained in our laboratory by syringe passage through common carp  
175 (*Cyprinus carpio*) as described previously (Dóro et al., 2019). Blood was drawn from  
176 infected carp and kept at 4°C overnight in siliconized tubes. Trypanosomes enriched at the  
177 interface between the red blood cells and plasma were collected and centrifuged at 800 xg  
178 for 8 min at room temperature. Trypanosomes were resuspended at a density of 5 x 10<sup>5</sup>-  
179 1 x 10<sup>6</sup> ml and cultured in 75 or 165 cm<sup>2</sup> flasks at 27°C without CO<sub>2</sub> in complete medium  
180 as described previously (Dóro et al., 2019). *T. carassii* were kept at a density below 5 x  
181 10<sup>6</sup>/ml, and sub-cultured 1-3 times a week. In this way *T. carassii* could be kept in culture  
182 without losing infectivity for up to 2 months. The majority of carp white blood cells present  
183 in the enriched trypanosome fraction immediately after isolation, died within the first 3-5  
184 days of culture and any remaining blood cell was removed prior to *T. carassii* injection into  
185 zebrafish. To this end, cells were centrifuged at 800 xg for 5 min in a 50 ml Falcon tube  
186 and the tube was subsequently tilted in a 20° angle in relation to the table surface,  
187 facilitating the separation of the motile trypanosomes along the conical part of the tube  
188 from the static pellet of white blood cells at the bottom of the tube.  
189 For zebrafish infection, trypanosomes were cultured for 1 week and no longer than 3  
190 weeks. Infection of zebrafish larvae was performed as described previously (Dóro et al.,  
191 2019). Briefly, prior to injection, 5 days post fertilization (dpf) zebrafish larvae were  
192 anaesthetized with 0.017% Ethyl 3-aminobenzoate methanesulfonate (MS-222, Tricaine,

Macrophages and neutrophils response to trypanosome infections in zebrafish

193 Sigma-Aldrich) in egg water. *T. carassii* were resuspended in 2% polyvinylpyrrolidone  
194 (PVP, Sigma-Aldrich) and injected (n=200) intravenously in the Duct of Cuvier.

195

### 196 **Clinical scoring system of the severity of infection**

197 Careful monitoring of the swimming behaviour of zebrafish larvae after infection (5 dpf  
198 onwards) as well as *in vivo* observation of parasitaemia development in transparent larvae,  
199 led to the observation that from 4 days post infection (dpi) onwards larvae could generally  
200 be segregated into high- and low-infected individuals. To objectively assign zebrafish to  
201 either one of these two groups, we developed a clinical scoring system (**Fig 1**). The first  
202 criterion looked at the escape reflex upon contact with a pipette and was sufficient to  
203 identify high-infected individuals as those not reacting to the pipet (slow swimmers). To  
204 categorize the remaining individuals, an infection score based on counting parasite: blood  
205 cell ratios in 100 events passing through the intersegmental capillary (ISC) above the  
206 cloaca was developed. The infection scores on a scale from 1 to 10 were assigned as  
207 follows: 1=no parasites observed, 2=1-10% parasite, 3=11-20% parasite, 4=21-30%  
208 parasite, 5=31-40% parasite, 6=41-55% parasite, 7=56-70% parasite, 8=71-85%  
209 parasite, 9=86-99%, 10=no blood cells observed. Larvae with infection scores between 1-  
210 3 were categorized as low-infected while scores between 6-10 were categorized as high  
211 infected. Larvae with scores 4-5 were reassessed 1 day later, at 5 dpi, and then categorised  
212 as high- or low-infected. Next to that, the swimming behaviour of larvae was observed and  
213 compared to the control group. Heartbeat of the larvae was monitored and noted if it was  
214 slower than the control. The diameter of the cardinal caudal vein in the trunk area after  
215 the cloaca region was measured in ImageJ 1.49o to quantify the degree of vasodilation.  
216 Eventual blockage of tail tip vessel-loop was also noted. Extravasation and the location of  
217 extravasated parasites (e.g. fins, muscle, intraperitoneal cavity, and interstitial space lining  
218 the blood vessels) was recorded.

219



## Macrophages and neutrophils response to trypanosome infections in zebrafish

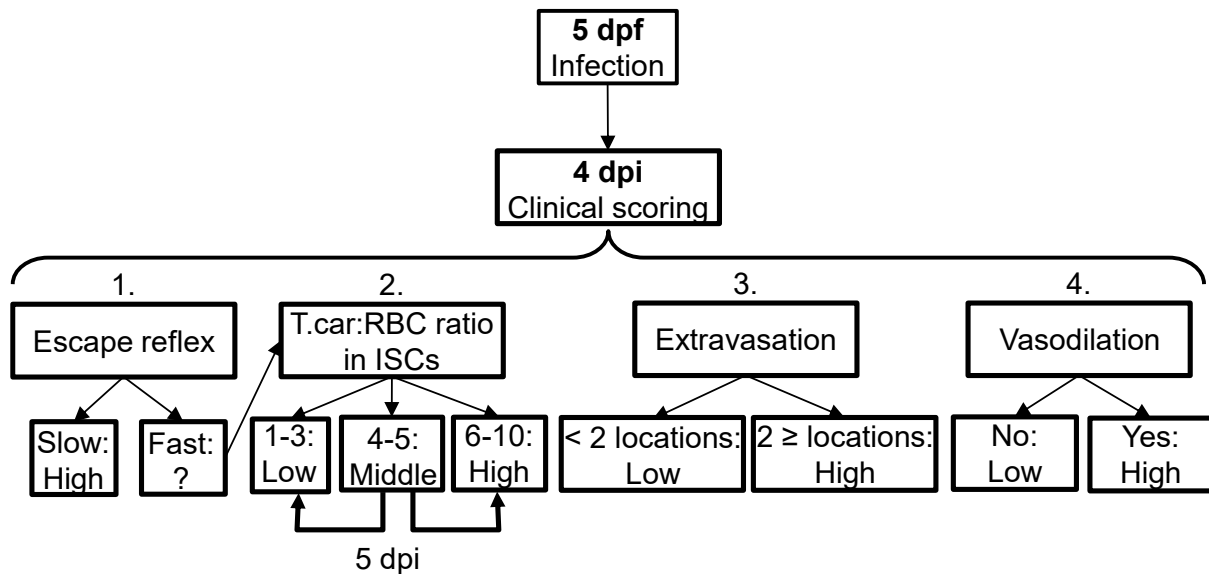

220

221 **Fig 1. Schematic overview of the clinical scoring system used to determine individual**  
222 **infection levels of *T. carassii*-infected zebrafish larvae.**

223 Zebrafish larvae infected with *T. carassii* can be analysed at 4 dpi; based on up to 4 different  
224 parameters including 1) visual monitoring of larval behaviour, 2) parasite numbers, 3) location  
225 or 4) vasodilation, larvae could be segregated into high- and low-infected individuals. See  
226 details in the text in the corresponding Materials & Methods section.

227

### 228 **Real-time quantitative PCR**

229 Zebrafish were sacrificed by an overdose of MS-222 anaesthetic (50 mg/L). At each time  
230 point 3-6 zebrafish larvae were sacrificed and pooled. Pools were transferred to RNA later  
231 (Ambion), kept at 4°C overnight and then transferred to -20°C for further storage. Total  
232 RNA isolation was performed with the Qiagen RNeasy Micro Kit (QIAGEN, Venlo, The  
233 Netherlands) according to manufacturer's protocol. Next, 250-500 ng total RNA was used  
234 as template for cDNA synthesis using SuperScript III Reverse Transcriptase and random  
235 hexamers (Invitrogen, Carlsbad, CA, USA), following the manufacturer's instructions with  
236 an additional DNase step using DNase I Amplification Grade (Invitrogen, Carlsbad, CA,  
237 USA). cDNA was then diluted 25 times to serve as template for real-time quantitative PCR  
238 (RT-qPCR) using Rotor-Gene 6000 (Corbett Research, QIAGEN), as previously described  
239 (Forlenza et al., 2012). Primers for *ef1a*: FW-CTGGAGGCCAGCTCAAACAT, RV-  
240 TCAAGAAGAGTAGTAGTACCG (ZDB-GENE-990415-52); *T. car. hsp70*: FW-  
241 CAGCCGGTGGAGCGCGT, RV-AGTTCCTTGCCGCGGAAGA (FJ970030.1, GeneBank) were  
242 obtained from Eurogentec (Liège, Belgium). Gene expression was normalized to the  
243 expression of *elongation factor-1 alpha (ef1a)* housekeeping gene and expressed relative  
244 to the PVP control at the same time point or to 0 days post injection (dpi) time point.

245

### 246 **In vivo imaging and videography of zebrafish**

247 Prior to imaging, zebrafish larvae were anaesthetised with 0.017% MS-222 (Sigma-  
248 Aldrich). For total fluorescence acquisition, double transgenic *Tg(mpeg1.4:mCherry-  
249 F;mpx:GFP)* were positioned on preheated flat agar plates (1% agar in egg water with



## Macrophages and neutrophils response to trypanosome infections in zebrafish

250 0.017% MS-222) and imaged with Fluorescence Stereo Microscope (Leica M205 FA). The  
251 image acquisition settings were as following: Zoom: 2.0 - 2.2, Gain: 1, Exposure time  
252 (ms): 70 (BF)/700 (GFP)/1500 (mCherry), Intensity: 60 (BF)/700 (GFP)/700 (mCherry),  
253 Contrast: 255/255 (BF)/ 70/255 (GFP)/ 15/255 (mCherry).

254 Alternatively, anaesthetised larvae were embedded in UltraPure LMP Agarose (Invitrogen)  
255 and positioned on the coverglass of a 35 mm petri dish, (14 mm microwell, coverglass No.  
256 0 (0.085-0.13mm), MatTek corporation) prior to imaging. A Roper Spinning Disk Confocal  
257 (Yokogawa) on Nikon Ti Eclipse microscope with 13x13 Photometrics Evolve camera (512  
258 x 512 Pixels 16 x 16 micron) equipped with a 40x (1.30 NA, 0.24 mm WD) OI objective,  
259 was used with the following settings: GFP excitation: 491nm, emission: 496-560nm,  
260 digitizer: 200 MHz (12-bit); 561 BP excitation: 561nm; emission: 570-620nm, digitizer:  
261 200 MHz (12-bit); BF: digitizer: 200 MHz (12-bit). Z-stacks of 1 or 0.5  $\mu$ m. An Andor-  
262 Revolution Spinning Disk Confocal (Yokogawa) on a Nikon Ti Eclipse microscope with Andor  
263 iXon888 camera (1024 x 1024 Pixels 13 x 13 micron) equipped with 40x (0.75 NA, 0.66  
264 mm WD) objective, 40x (1.15 NA, 0.61-0.59 mm WD) WI objective, 20x (0.75 NA, 1.0  
265 mm WD) objective and 10x (0.50 NA, 16 mm WD) objective was used with the following  
266 settings: Dual pass 523/561: GFP excitation: 488nm, emission: 510-540nm, EM gain: 20-  
267 300ms, digitizer: 10 MHz (14-bit); RFP excitation: 561nm; emission: 589-628nm, EM gain:  
268 20-300ms, digitizer: 10 MHz (14-bit); BF DIC EM gain: 20-300ms, digitizer: 10 MHz (14-  
269 bit). Z-stacks of 1  $\mu$ m. Images were analysed with ImageJ-Fijii (version 1.52p).

270 High-speed videography of *T. carassii* swimming behaviour *in vivo* was performed as  
271 described previously (Dóro et al., 2019). Briefly, the high-speed camera was mounted on  
272 a DMi8 inverted digital microscope (Leica Microsystems), controlled by Leica LASX software  
273 (version 3.4.2.) and equipped with 40x (NA 0.6) and 20x (NA 0.4) long distance objectives  
274 (Leica Microsystems). For high-speed light microscopy a (8 bits) EoSens MC1362  
275 (Mikrotron GmbH, resolution 1280 x 1024 pixels), with Leica HC 1x Microscope C-mount  
276 Camera Adapter, was used, controlled by XCAP-Std software (version 3.8, EPIX inc.).  
277 Images were acquired at a resolution of 900 x 900 or 640 x 640 pixels. Zebrafish larvae  
278 were anaesthetised with 0.017% MS-222 and embedded in UltraPure LMP Agarose  
279 (Invitrogen) on a microscope slide (1.4-1.6 mm) with a well depth of 0.5-0.8 mm (Electron  
280 Microscopy Sciences). Upon solidification of the agarose, the specimen was covered with  
281 3-4 drops of egg water containing 0.017% MS-222, by a 24 x 50 mm coverslip and imaged  
282 immediately. For all high-speed videography, image series were acquired at 480-500  
283 frames per second (fps) and analysed using a PFV software (version 3.2.8.2) or MiDAS  
284 Player v5.0.0.3 (Xcite, USA).

285

### 286 **Fluorescence quantification**

287 Quantification of total cell fluorescence in zebrafish larvae was performed in ImageJ

## Macrophages and neutrophils response to trypanosome infections in zebrafish

288 (version 1.49o) using the free-form selection tool and by accurately selecting the larvae  
289 area. Owing to the high auto-fluorescence of the gut or gut content, and large individual  
290 variation, the gut area was excluded from the total fluorescence signal. Area integrated  
291 intensity and mean grey values of each selected larva were measured by the software. To  
292 correct for the background, three consistent black areas were selected in each image.  
293 Analysis was performed using the following formula: corrected total cell fluorescence  
294 (CTCF) = Integrated density - (Area X Mean background value).

295

### 296 **EdU proliferation assay and immunohistochemistry**

297 iCLICK™ EdU (5- ethynyl-2'- deoxyuridine, component A) from ANDY FLUOR 555 Imaging  
298 Kit (ABP Biosciences) at a stock concentration of 10 mM, was diluted in PVP to 1.13 mM.  
299 Infected *Tg(mpeg1:eGFP)* or *Tg(mpx:GFP)* larvae were injected in the heart cavity at 3 dpi  
300 (8dpf) with 2 nl of solution, separated in high- and low-infected individuals at 4 dpi and  
301 euthanized 6-8 hours later (30-32h after EdU injection) with an overdose of anaesthetic  
302 (0.4% MS-222 in egg water). Following fixation in 4% paraformaldehyde (PFA, Thermo  
303 Scientific) in PBS, o/n at 4°C, larvae were washed three times in buffer A (0.1% (v/v)  
304 tween-20, 0.05% (w/v) azide in PBS), followed by dehydration: 50% MeOH in PBS, 80%  
305 MeOH in H<sub>2</sub>O and 100% MeOH, for 15 min each, at room temperature (RT), with gentle  
306 agitation. To remove background pigmentation, larvae were incubated in bleach solution  
307 (5% (v/v) H<sub>2</sub>O<sub>2</sub> and 20% (v/v) DMSO in MeOH) for 1h at 4°C, followed by rehydration:  
308 100% MeOH, 80% MeOH in H<sub>2</sub>O, 50% MeOH in PBS for 15 min each, at room temperature  
309 (RT), with gentle agitation. Next, larvae were incubated three times for 5 min each in  
310 buffer B (0.2%(v/v) triton-x100, 0.05% azide in PBS) at RT with gentle agitation followed  
311 by incubation in EdU iCLICK™ development solution for 30 min at RT in the dark and three  
312 rapid washes with buffer B.

313 The described EdU development led to loss of GFP signal in the transgenic zebrafish.  
314 Therefore, to retrieve the position of neutrophils or macrophages, wholemount  
315 immunohistochemistry was performed. Larvae were blocked in 0.2% triton-x100, 10%  
316 DMSO, 6% (v/v) normal goat serum and 0.05% azide in PBS, for 3h, at RT with gentle  
317 agitation. Next, the primary antibody Chicken anti-GFP (Aves labs.Inc., 1:500) in Antibody  
318 buffer (0.2% tween-20, 0.1% heparin, 10% DMSO, 3% normal goat serum and 0.05%  
319 azide in PBS) was added and incubated overnight (o/n) at 37°C. After three rapid and  
320 three 5 min washes in buffer C (0.1% tween-20, 0.1% (v/v) heparin in PBS), at RT with  
321 gentle agitation, the secondary antibody goat anti-chicken-Alexa 488 (Abcam, 1:500) was  
322 added in Antibody buffer and incubated o/n at 37°C. After three rapid and three 5 min  
323 washes in buffer C, at RT with gentle agitation, larvae were imaged with Andor Spinning  
324 Disk Confocal Microscope.

325

Macrophages and neutrophils response to trypanosome infections in zebrafish

326 **BODIPY injection**

327 BODIPY™ FL pentanoic acid (BODIPY-FL5, Invitrogen) was diluted in DMSO to a 3 mM stock  
328 solution. Stock solution was diluted 100x (30 µM) with PVP. Infected larvae 3 dpi (8 dpf)  
329 were injected with 1 nl of the solution i.p. (heart cavity) and imaged 18-20 hours later.

330

331 **Statistical analysis**

332 Analysis of gene expression and total fluorescence data were performed in GraphPad  
333 PRISM 5. Statistical analysis of gene expression data was performed on Log(2) transformed  
334 values followed by One-way ANOVA and Dunnett's multiple comparisons test. Analysis of  
335 Corrected Total Cell Fluorescence was performed on Log(10) transformed values followed  
336 by Two-way ANOVA and Bonferroni multiple comparisons post-hoc test. Analysis of EdU<sup>+</sup>  
337 macrophages was performed on Log(10) transformed values followed by One-way ANOVA  
338 and Bonferroni multiple comparisons post-hoc test. In all cases,  $p < 0.05$  was considered  
339 significant.

Macrophages and neutrophils response to trypanosome infections in zebrafish

340 **Results**

341

342 **Susceptibility of zebrafish larvae to *T. carassii* infection**

343 We recently reported the establishment of a trypanosome infection in zebrafish larvae  
344 using a natural fish parasite, *Trypanosoma carassii* (Dóro et al., 2019). To further  
345 investigate the immune response to *T. carassii* infection, we first investigated the kinetics  
346 of susceptibility of zebrafish larvae as well as the kinetics of expression of various immune-  
347 related genes. Similar to the previous report, *T. carassii* infection of 5 dpf zebrafish larvae  
348 leads to approximately 10-20% survival by 15 days post infection (dpi) with the highest  
349 incidence of mortality between 4 and 7dpi (**Fig 2A**). The onset of mortality coincided with  
350 the peak of parasitaemia as assessed by real-time quantitative gene expression analysis  
351 of a *T. carassii*-specific gene (**Fig 2B**). Nevertheless, we consistently observed 10-20%  
352 survival in the *T. carassii*-infected group, suggesting that zebrafish larvae can control *T.*  
353 *carassii* infection. This observation prompted us to investigate the kinetics of parasitaemia  
354 and development of (innate) immune responses at the individual level.

355

356

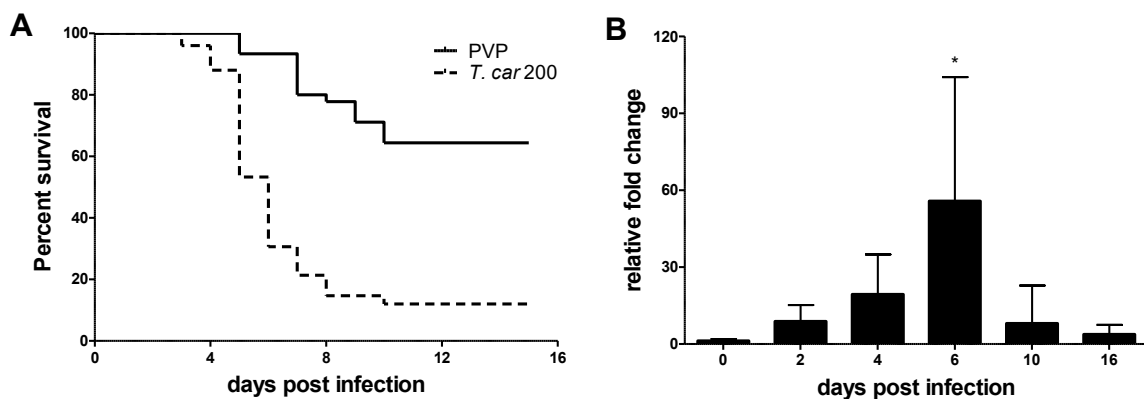

357

358

359 **Fig 2. *T. carassii* infection of larval zebrafish.**

360 **A)** *Tg(mpeg1.4:mCherry-F;mpx:GFP)* larvae (5 dpf) were injected intravenously with  $n=200$  *T.*  
361 *carassii*/fish or with PVP as control and survival was monitored over a period of 15 days. **B)**  
362 *Tg(mpeg1.4:mCherry-F;mpx:GFP)* zebrafish (5 dpf) were treated as in A and sampled at  
363 various time points. At each time point, 3-6 pools of 3-5 larvae were sampled for real-time  
364 quantitative PCR analysis. Relative fold change of the *T. carassii*-specific *heat-shock protein-70*  
365 (*hsp70*) was normalised to the zebrafish-specific *ef1a* and expressed relative to the parasite  
366 injected group at time point 0h. Bars indicate average and standard deviation (SD) on  $n=3-6$   
367 pools per time point.

### 368 **Clinical signs of *T. carassii* infection and clinical scoring system**

369 To characterize the response to *T. carassii* infection in individual zebrafish larvae, we  
370 developed a clinical scoring system to determine individual infection levels, enabling us to  
371 group individual larvae based on severity of infection. From 4 dpi onwards, we could  
372 consistently sort larvae into groups of high- or low-infected individuals based on *in vivo*  
373 observations, without the need to sacrifice animals (**S1 Video**). Infection levels were  
374 categorised using four criteria: 1) escape reflex (slow vs fast) upon contact with a pipette  
375 tip, 2) infection scores (1-10, see details in Materials and Methods), based on the ratio of  
376 blood cells and parasites passing through an intersegmental capillary (ISC) in 100 events  
377 (**Fig 3A, 3B**) (**S1 Video**, 00:06-00:39 sec), 3) extravasation, based on the presence of  
378 parasites outside of blood vessels (**Fig 3C**) (**S1 Video**, 00:40-1:20 sec) and 4)  
379 vasodilation, based on the diameter of the cardinal caudal vein (**Fig 3D, 3E**). The first  
380 criterion defined all individuals with a minimal escape reflex (slow swimmers) as high-  
381 infected individuals: they were mostly located at the bottom of the tank and showed  
382 minimal reaction upon direct contact with a pipette. Larvae with a normal escape reflex  
383 (fast swimmers) however, were not exclusively low-infected individuals. Therefore, a  
384 second criterion was used based on trypanosome counting in ISC (**S1 Video**, 00:06-00:39  
385 sec). Individuals with an infection score between 1-3 were categorized as low-infected and  
386 always survived the infection (see Materials and Methods). Individuals with an infection  
387 score between 6-10 were categorized as high-infected and generally succumbed to the  
388 infection. Individuals with an intermediate score (4-5) could go both ways: they either  
389 showed a delayed parasitaemia and later developed high parasitaemia (common) or  
390 recovered from the infection (rare). The third criterion clearly identified high-infected  
391 individuals as those showing extensive extravasation at two or more of the following  
392 locations: peritoneal cavity (**Fig 3C**) (**S1 Video**, 00:40-00:59 sec), interstitial space lining  
393 the blood vessels, muscle tissue (**S1 Video**, 01:00-01:07 sec) or fins (**S1 Video**, 01:08-  
394 01:20 sec), in particular the anal fin. At these locations, in high-infected individuals,  
395 trypanosomes could accumulate in high numbers, filling up all available spaces.  
396 Extravasation however could also occur in low-infected individuals, but to a lesser extent.  
397 The fourth criterion, vasodilation of the cardinal caudal vein associated with high numbers  
398 of trypanosomes in the blood vessels, was a definitive sign of high infection level, and  
399 never occurred in low-infected larvae. To validate our scoring system, expression of a *T.*  
400 *carassii*-specific gene was analysed in pools of larvae classified as high- or low-infected.  
401 As expected, in individuals categorized as high-infected, *T. carassii*-specific gene  
402 expression increased more than 60-fold whereas in low-infected individuals the increase  
403 was less than 20-fold (**Fig 3F**). Altogether these data show that *T. carassii* infects zebrafish  
404 larvae, but that the infection can develop differently among individuals, leading to different  
405 outcomes. The clinical scoring system based on numerous criteria is suitable to reliably



Macrophages and neutrophils response to trypanosome infections in zebrafish

406 separate high- and low-infected larvae to further investigate individual immune responses.  
407  
408  
409

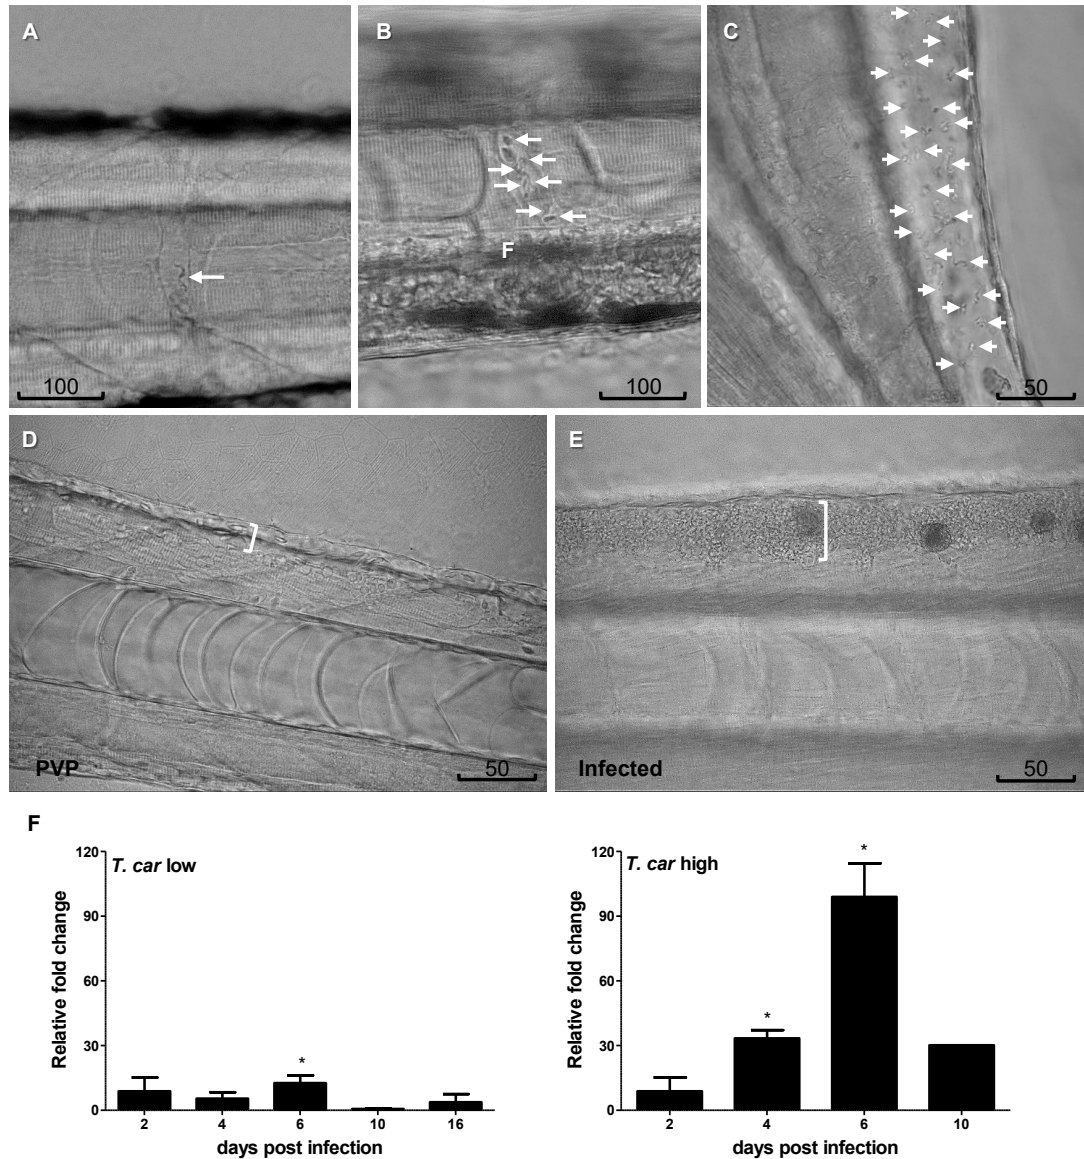

410  
411 **Fig 3. Progression of *T. carassii* infection in zebrafish larvae.**  
412 *Tg(mpeg1.4:mCherry-F;mpx:GFP)* 5 dpf zebrafish were injected with  $n=200$  *T. carassii* or with  
413 PVP and imaged at 2 dpi (A), 5 dpi (B-C), 7 dpi (D-E) or sampled at various time points after  
414 infection (F). Shown are representative images of intersegmental capillaries (ISC) containing  
415 various number of *T. carassii* (white arrows) (A-B); extravasated *T. carassii* (only some  
416 indicated with white arrows) in the intraperitoneal cavity (C); cardinal caudal vein diameter in  
417 PVP (D) or in *T. carassii*-infected larvae (E). Square brackets indicate the diameter of the  
418 cardinal caudal vein. Frames are extracted from high-speed videos acquired with a Leica DMI8  
419 inverted microscope at a 40x magnification. F) *T. carassii* infection level. High- and low-infected  
420 individuals were separated from 4 dpi onwards based on our clinical scoring criteria. At each  
421 time point, 3 pools of 3-5 larvae were sampled for subsequent real-time quantitative gene  
422 expression analysis. Each data point represents the mean of 3 pools, except for the high-  
423 infected group at 10 dpi where only one pool could be made due to low survival. Relative fold  
424 change of the *hsp70* was normalised relative to the zebrafish-specific *ef1a* housekeeping gene  
425 and expressed relative to the trypanosome-injected group at time point 0h.

Macrophages and neutrophils response to trypanosome infections in zebrafish

426 ***T. carassii* infection induces a strong macrophage response in zebrafish larvae**

427 After having established a method to determine infection levels in each larva, we next  
428 investigated whether a differential innate immune response would be mounted in high-  
429 and low-infected fish. To this end, using double-transgenic *Tg(mpeg1.4:mCh-F;mpx:GFP)*  
430 zebrafish, we first analysed macrophage and neutrophil responses in whole larvae by  
431 quantifying total cell fluorescence in high- and low-infected individuals (**Fig 4**). Total  
432 neutrophil response (total green fluorescence) was not significantly affected by the  
433 infection (**Fig 4A, 4C**). In contrast, the macrophage response (total red fluorescence)  
434 increased significantly in infected individuals from 3 dpi onwards, and was most prominent  
435 in the head region and along the cardinal caudal vein (**Fig 4B**). In low-infected larvae, a  
436 significant increase in red fluorescence was observed already by 5 dpi and remained high  
437 up until 9 dpi; in high-infected larvae, despite a marginal but not significant increase at 5  
438 and 7 dpi, significant differences were observed at day 9 after infection (**Fig 4C**).  
439 Interestingly, no significant differences were observed between high- or low-infected  
440 individuals, suggesting that despite the differences in trypanosome levels (**Fig 3F**),  
441 macrophages respond to the presence and not to the number of trypanosomes.



Macrophages and neutrophils response to trypanosome infections in zebrafish

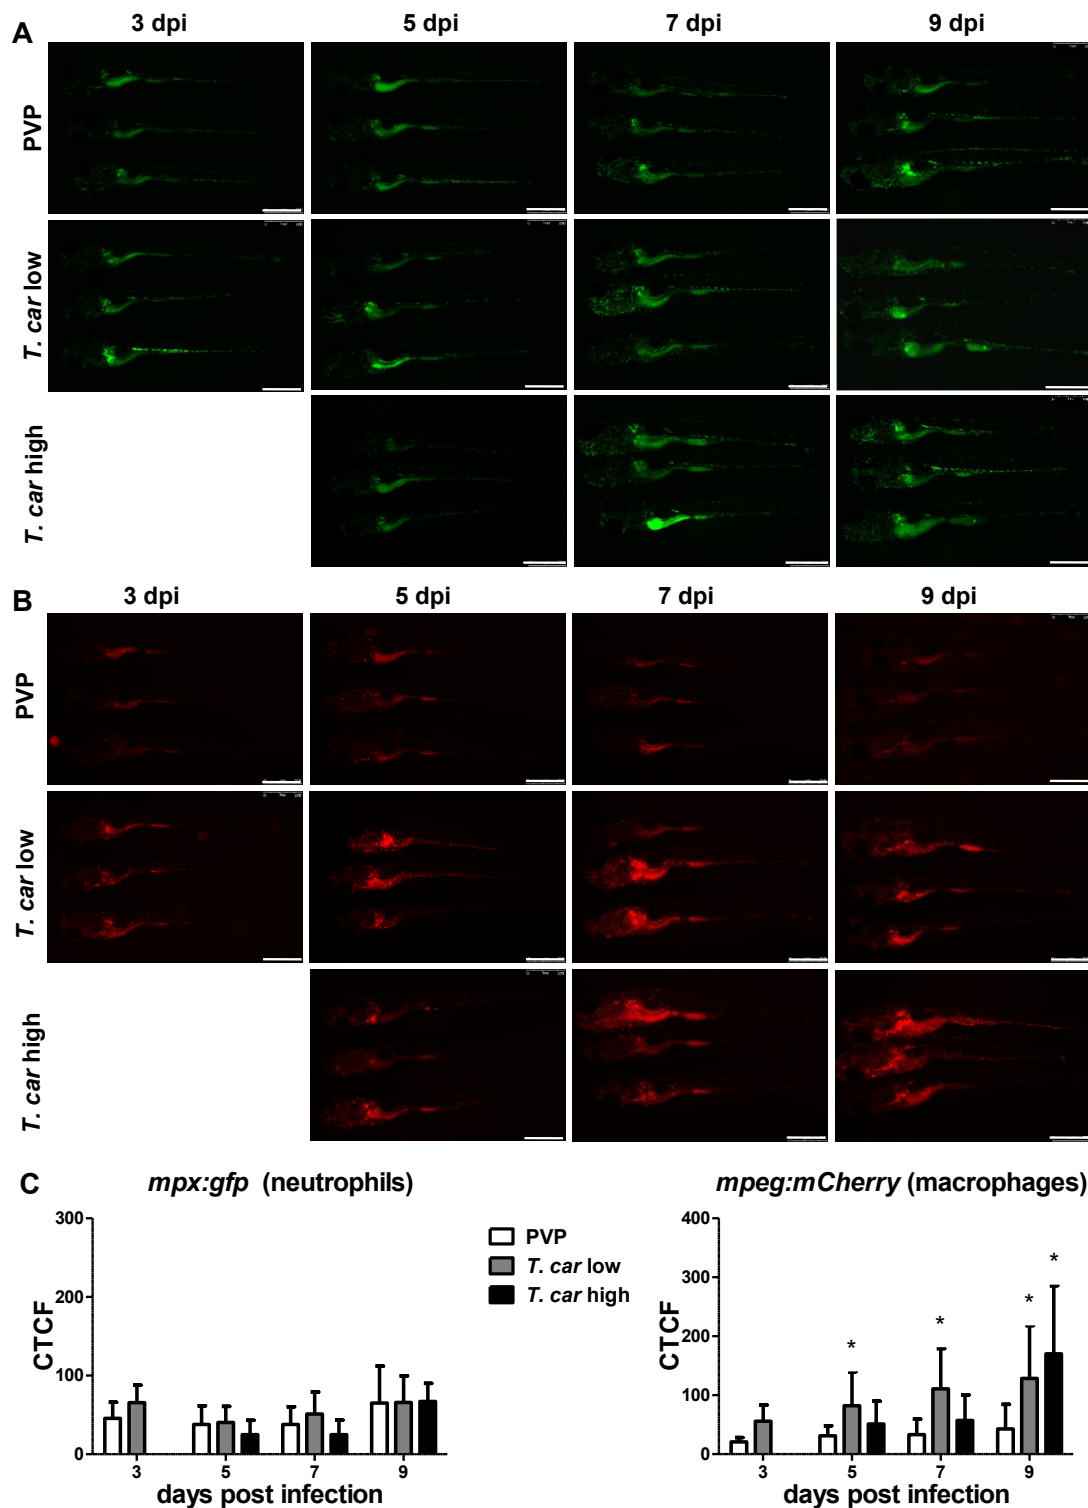

442

443 **Fig 4. Macrophages respond more prominently than neutrophils to *T. carassii***  
 444 **infection.** *Tg(mpeg1.4:mCherry-F;mpx:GFP)* were injected intravenously at 5 dpf with  $n=200$   
 445 *T. carassii* or with PVP. At 4 dpi larvae were separated in high- and low-infected individuals. **A-**  
 446 **B)** At the indicated time points, images were acquired with Leica M205FA Fluorescence Stereo  
 447 Microscope with 1.79x zoom. Images are representatives of  $n=3-44$  larvae per group,  
 448 depending on the number of high- or low-infected larvae categorized at each time point. Scale  
 449 bar indicates 750  $\mu\text{m}$ . **C)** Corrected Total Cell Fluorescence (CTCF) quantification of infected  
 450 and non-infected larvae. Owing to the high auto-fluorescence, the gut area was excluded  
 451 from the total fluorescence signal as described in the methods section. Bars represent  
 452 average and standard deviation of red and green fluorescence in  $n=5-44$  whole larvae, from 2  
 453 independent experiments. \* indicates significant differences ( $P < 0.05$ ) to the respective PVP  
 454 control as assessed by Two-Way ANOVA followed by Bonferroni post-hoc test.

455 ***T. carassii* infection promotes macrophage and neutrophil proliferation**

456 The increase in overall red fluorescence can be indicative of activation of the *mpeg*  
457 promotor driving mCherry expression, but also of macrophage proliferation. To address  
458 the latter hypothesis, *Tg(mpeg1:eGFP)* or *Tg(mpx:GFP)* zebrafish larvae were infected with  
459 *T. carassii*, and subsequently injected with iCLICK™ EdU for identification of proliferating  
460 cells. With respect to proliferation, developing larvae display a generalized high rate of cell  
461 division throughout the body that increases overtime particularly in hematopoietic organs  
462 such as the thymus or the head kidney. Thus, for a more sensitive quantification of the  
463 proliferative response of macrophages and neutrophils in response to the infection, EdU  
464 was injected at 3 dpi (8 dpf), and at 4 dpi, larvae were separated in high- and low-infected  
465 individuals, followed by fixation and whole mount immunohistochemistry 6-8h later (30-  
466 32h after EdU injection). This allowed evaluating the macrophage and neutrophil response  
467 right at the onset of the macrophage response observed in **Fig 4C** and concomitantly with  
468 the development of differences in parasitaemia. As expected, EdU<sup>+</sup> nuclei could be  
469 identified throughout the body of developing larvae. When specifically looking at  
470 proliferating macrophage (**Fig 5**) and neutrophils (**Fig 6**) we selected the area of the head  
471 (left panels) and trunk (right panels) region, where previously (**Fig 4B**) the highest  
472 increase in red fluorescence was observed.

473 When analysing the macrophage response, a greater number of macrophages was  
474 observed in the head and trunk of both high- and low-infected larvae compared to PVP-  
475 injected individuals (**Fig 5A**, 10x magnifications). In the head, macrophages were  
476 scattered throughout the region but in infected larvae they were most abundant in the area  
477 corresponding to the haematopoietic tissue (head kidney), posterior to the branchial  
478 arches, indicative of proliferation of progenitor cells. In the trunk, macrophages were  
479 scattered throughout the tissue, and in high-infected larvae in particular, macrophages  
480 also clustered in the cardinal caudal vein (**Fig 5A**, right panels). In agreement with  
481 previous observations (**Fig 4C**), quantification of total green fluorescence confirmed a  
482 significant increase in the head and trunk of low-infected larvae. In high-infected  
483 individuals, a significant increase was observed in the trunk, whereas in the head the  
484 number of macrophages was clearly elevated although not significantly when compared to  
485 the PVP-injected controls (**Fig 5B**). In all groups, total cell fluorescence in the head region  
486 was significantly higher than in the trunk region (**Fig 5B**), and thus largely contributed to  
487 the total cell fluorescence previously measured in whole larvae (**Fig 4C**). The difference in  
488 CTCF values between Fig 4 and Fig 5 can be attributed to the different microscopes and  
489 magnification used for the acquisition as well as fluorescence source (GFP or mCherry in  
490 Fig 4 and Alexa-488 fluorophore in Fig 5).

491 Given the high number of macrophages in the head region, their heterogeneous  
492 morphology, the thickness of the tissue and the overall high number of EdU<sup>+</sup> nuclei, it was

## Macrophages and neutrophils response to trypanosome infections in zebrafish

493 not possible to reliably count single (EdU<sup>+</sup>) macrophages in this area. Therefore, when  
494 analysing the degree of proliferation, we focused on the trunk region only. There, EdU<sup>+</sup>  
495 macrophages could be observed in all groups, and in agreement with the total cell  
496 fluorescence measured in the same region (**Fig 5B**), their number was higher in low- and  
497 high-infected individuals compared to PVP-injected controls (**Fig 5C** and corresponding **S2**  
498 **Video**). No significant difference was observed between high- and low-infected fish,  
499 confirming that macrophages react to the presence and not to the number of  
500 trypanosomes. Within the trunk region of high-infected larvae, a large proportion of  
501 macrophages were observed around and inside the cardinal caudal vein, the majority of  
502 which were EdU<sup>+</sup> (**S1A Fig**), suggesting that in high-infected larvae, proliferating  
503 macrophages migrated to the vessels. Altogether, these data confirm that *T. carassii*  
504 infection triggers macrophage proliferation and that proliferation is higher in low-infected  
505 compared to high-infected individuals, possibly due to a higher haematopoietic activity.  
506 When analysing the neutrophils response, in agreement with the previous observation, the  
507 number of neutrophils in the head and trunk regions was not apparently different between  
508 infected and non-infected larvae (**Fig 6A**). Neutrophils were scattered throughout the head  
509 region, but differently from macrophages, their number did not increase in the area  
510 corresponding to the haematopoietic tissue. Quantification of total cell fluorescence in the  
511 head and trunk revealed no significant differences between groups (**Fig 6B**, **S3 Video**).  
512 Interestingly, quantification of EdU<sup>+</sup> neutrophils in the trunk region, revealed that while in  
513 PVP-injected individuals EdU<sup>+</sup> neutrophils were rarely observed, in infected fish, a  
514 significant, although low number of EdU<sup>+</sup> neutrophils was present (**Fig 6C**). These data  
515 indicate that neutrophils also respond to the infection by proliferating, but their number is  
516 relatively low and may have not significantly contributed to changes in total cell  
517 fluorescence. In contrast to macrophages, within the analysed trunk region, neutrophils  
518 were never observed within the cardinal caudal vein, and independently of whether they  
519 proliferated (EdU<sup>+</sup>) or not, were mostly observed lining the vessel (**S1B Fig**). Altogether,  
520 these data indicate that independent of the trypanosome number, *T. carassii* triggers a  
521 differential macrophage and neutrophil proliferation, where macrophages respond more  
522 prominently than neutrophils to the infection.  
523

Macrophages and neutrophils response to trypanosome infections in zebrafish

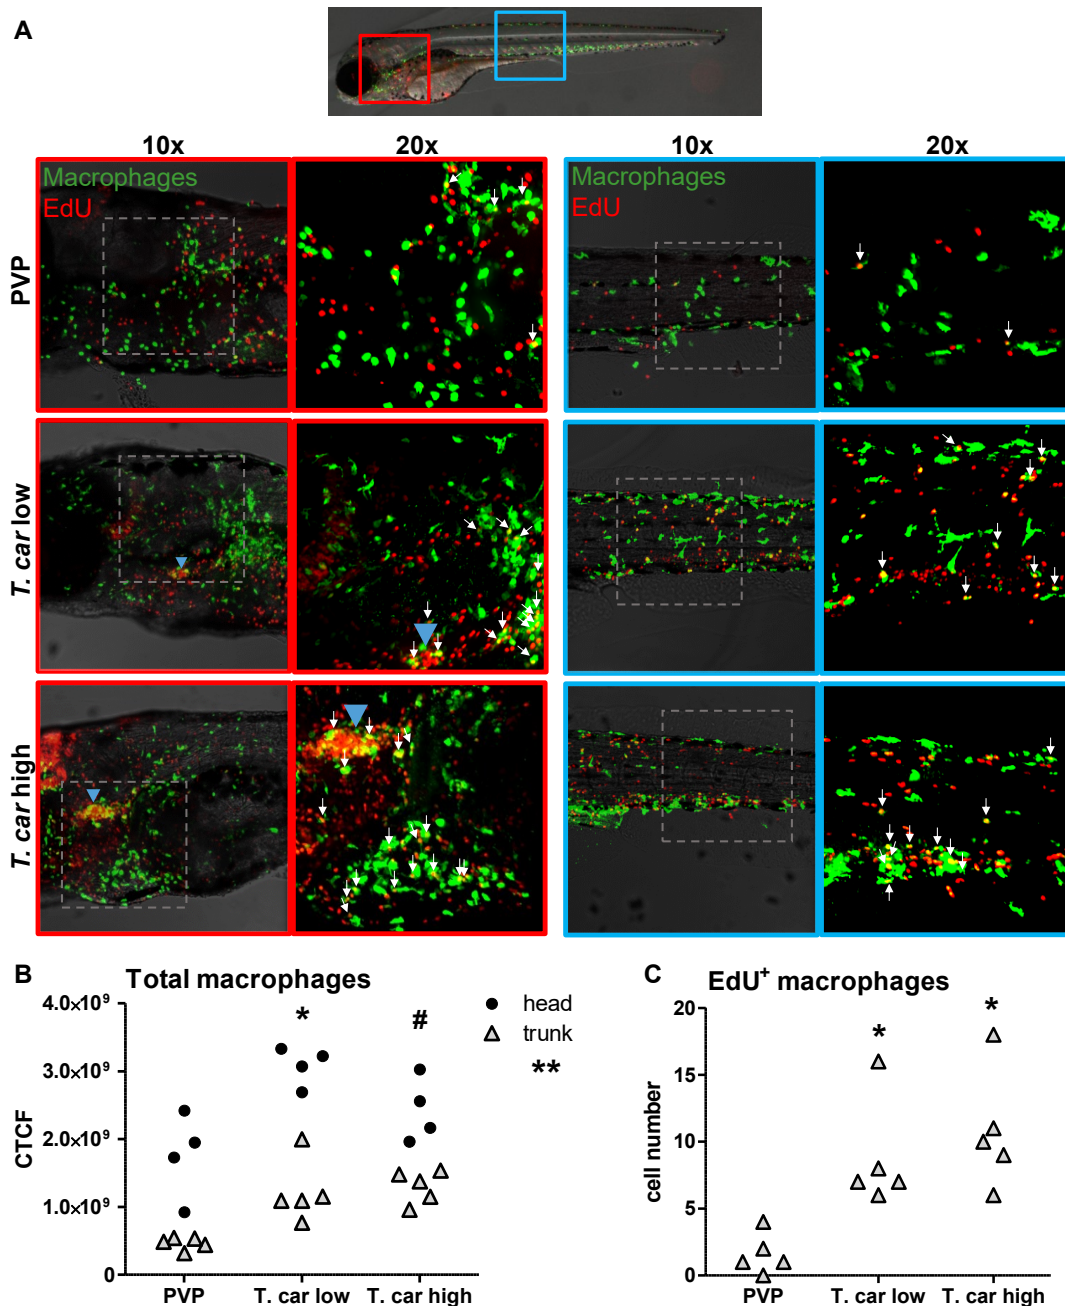

524

525

**Fig 5. *T. carassii* infection triggers macrophage proliferation.**

526 *Tg(mpeg1:eGFP)* zebrafish larvae were infected intravenously at 5 dpf with n=200 *T. carassii*  
 527 or with PVP control (n=5 larvae per group, from four independent experiments). At 3 dpi, larvae  
 528 received 2 nl 1.13mM iCLICK™ EdU, at 4 dpi were separated in high- and low-infected  
 529 individuals and were imaged after fixation and whole mount immunohistochemistry 6-8h later  
 530 (30-32h after EdU injection, ~9 dpf). Larvae were fixed and treated with iCLICK EdU ANDY  
 531 FLUOR 555 (Red) development to identify EdU<sup>+</sup> nuclei and with anti-GFP antibody to retrieve  
 532 the position of macrophages, as described in the material and methods section. Larvae were  
 533 imaged with Andor Spinning Disc Confocal Microscope using 10x and 20x magnification. **A**  
 534 Representative maximum projections of the head (left panels, red boxes) and trunk (right  
 535 panels, blue boxes) regions capturing macrophages (green) and EdU<sup>+</sup> nuclei (red) in PVP  
 536 control, low- and high-infected zebrafish. In the PVP control group, EdU<sup>+</sup> nuclei and GFP<sup>+</sup>  
 537 macrophages only rarely overlapped (white arrows, 20x), indicating limited proliferation of  
 538 macrophages. In high- and low-infected individuals, the number of EdU<sup>+</sup> macrophages  
 539 increased (white arrows, 20x), indicating proliferation of macrophages in response to *T. carassii*  
 540 infection. Blue arrowhead in the head of low and high-infected larvae, indicates the position of  
 541 the thymus, an actively proliferating organ at this time point. The identification of EdU<sup>+</sup>  
 542 macrophages (white arrows) was performed upon detailed analysis of the separate stacks used

## Macrophages and neutrophils response to trypanosome infections in zebrafish

543 to generate the overlay images, and are provided in **S2 Video. B)** Corrected total cell  
544 fluorescence (CTCF) calculated in the head (circles) and trunk (triangles) region. Symbols  
545 indicate individual larvae. \* indicates significant differences of both, the head and trunk region  
546 to the respective PVP controls; # indicates significant differences of the trunk to the respective  
547 PVP control; \*\* indicates significant differences between CTCF in the head and trunk regions,  
548 as assessed by Two-Way ANOVA followed by Bonferroni post-hoc test. **C)** Number of EdU<sup>+</sup>  
549 macrophages in the trunk region of infected and non-infected larvae. Symbols indicate  
550 individual larvae. \* indicates significant differences to the PVP control as assessed by One-Way  
551 ANOVA followed by Bonferroni post-hoc test.



Macrophages and neutrophils response to trypanosome infections in zebrafish

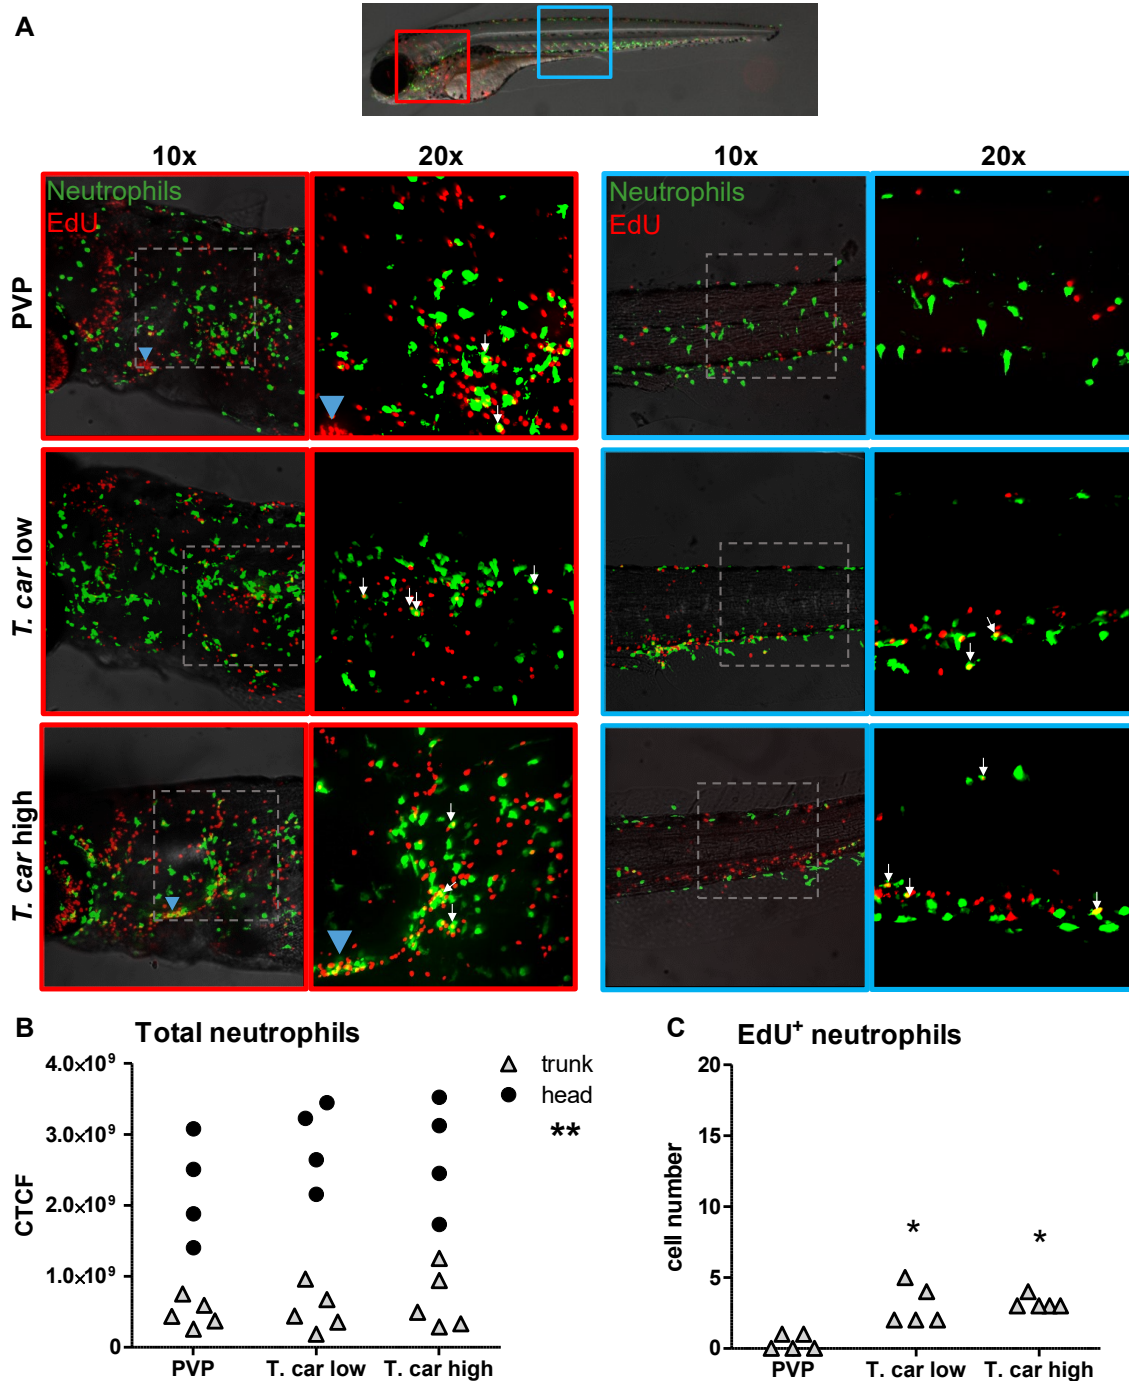

552  
553  
554  
555  
556  
557  
558  
559  
560  
561  
562  
563  
564  
565  
566  
567  
568

**Fig 6. *T. carassii* infection triggers neutrophil proliferation.**

*Tg(mpx:GFP)* were treated as described in Fig 5 (n=5 larvae per group, from four independent experiments). **A**) Representative maximum projections of the head (left panels, red boxes) and trunk (right panels, blue boxes) region capturing neutrophils (green) and EdU<sup>+</sup> nuclei (red) in PVP, low- and high-infected zebrafish. The images acquired at a 20x magnification show that in all groups, EdU<sup>+</sup> nuclei and GFP<sup>+</sup> neutrophils only rarely overlapped (white arrows), and was marginally higher in infected than in non-infected PVP controls. Detailed analysis of the separate stacks selected to compose the overlay image of the head region of the high-infected larva (bottom left panel), revealed that none of the neutrophils in the area indicated by the blue arrowhead (thymus) were EdU<sup>+</sup> (**S3 Video**). **B**) Corrected total cell fluorescence (CTCF) calculated in the head (circles) and trunk (triangles) region. Symbols indicate individual larvae. \*\* indicates significant differences between CTCF in the head and trunk regions, as assessed by Two-Way ANOVA followed by Bonferroni post-hoc test. **C**) Number of EdU<sup>+</sup> neutrophils in the trunk region of infected and non-infected larvae. Symbols indicate individual larvae. \* indicates significant differences to the PVP control as assessed by One-Way ANOVA followed by Bonferroni post-hoc test.

569 **Differential distribution of neutrophils and macrophages in high- and low-**  
570 **infected zebrafish larvae**

571 After having established that *T. carassii* infection triggers macrophage, and to a lesser  
572 extent, neutrophil proliferation, we next investigated whether a differential distribution of  
573 these cells occurred during infection. Considering that trypanosomes are blood dwelling  
574 parasites and the kinetics of parasitaemia, we focused on the cardinal caudal vein at 4 dpi,  
575 a time point at which clear differences in parasitaemia (**Fig 3**) and a differential distribution  
576 of macrophages and neutrophils (**Fig 5-6** and **S1 Fig**) were observed between high- and  
577 low-infected larvae. To this end, crosses between transgenic lines marking the blood  
578 vessels and those marking either macrophages or neutrophils were used. *Tg(kdrl:caax-*  
579 *mCherry;mpx:GFP)* or *Tg(fli1:eGFP x mpeg1.4:mCherry-F)* were infected with *T. carassii*,  
580 separated into high- and low-infected larvae at 4 dpi, and imaged with Roper Spinning Disk  
581 Confocal Microscope using 40x magnification. Longitudinal and orthogonal images of the  
582 vessel were analysed to visualise the exact location of cells along the cardinal caudal vein  
583 (**Fig 7** and **S4 Video**). In PVP controls, both macrophages and neutrophils were exclusively  
584 located outside the vessel in close contact with the endothelium or in the tissue adjacent  
585 the cardinal caudal vein. In infected fish, while neutrophils remained exclusively outside  
586 the vessel (**Fig 7**, left panel), macrophages could be seen both inside (white arrows) and  
587 outside (blue arrows) the vessel (**Fig 7**, right panel). Whilst in low-infected individuals  
588 macrophage morphology was similar to that observed in non-infected fish, in high-infected  
589 larvae, macrophages inside the vessel clearly had a more rounded morphology. Altogether  
590 these data indicate that differently from neutrophils, macrophages increase in number in  
591 infected fish, are recruited inside the cardinal caudal vein and, depending on the infection  
592 level, their morphology can be greatly affected.



Macrophages and neutrophils response to trypanosome infections in zebrafish

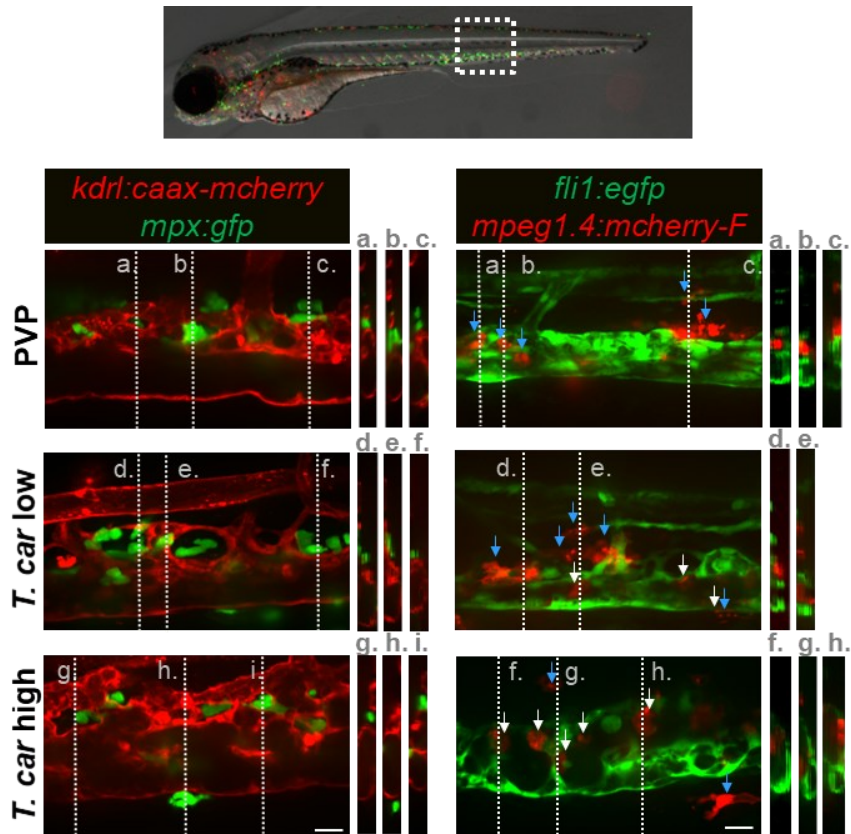

593 **Fig 7. Macrophages are recruited into the cardinal caudal vein of high-infected zebrafish**  
594 **larvae.** *Tg(kdr1:caax-mCherry;mpx:GFP)* and *Tg(fli1:eGFP x mpeg1.4: mCherry-F)* zebrafish larvae  
595 ( $n=5$  larvae per group, from two independent experiments) were injected intravenously at 5 dpf with  
596  $n=200$  *T. carassii* or with PVP. At 4 dpi larvae were separated in high- and low-infected groups and  
597 imaged with a Roper Spinning Disk Confocal Microscope using 40x magnification. Scale bars indicate  
598 25 μm. **Left panel:** representative images of the longitudinal view of the cardinal caudal vein (red),  
599 capturing the location of neutrophils (green). Orthogonal views of the locations marked with grey  
600 dashed lines (a,b,c,d,e,f,g,h,i), confirm that in all groups, neutrophils are present exclusively outside  
601 the vessel. **Right panel:** representative images of the longitudinal view on the vessel, capturing the  
602 position of macrophages (red) outside (blue arrowheads) or inside (white arrowheads) the vessel  
603 (green). Orthogonal views of the locations marked with grey dashed lines (a,b,c,d,e,f,g,h)  
604 confirm that in PVP controls, macrophages are present exclusively outside the vessel (blue arrows); in low-  
605 infected larvae, most macrophages are outside the vessel (blue arrows) having an elongated or  
606 dendritic morphology, although seldomly rounded macrophages can be observed within the vessel  
607 (white arrows); in high-infected larvae, although macrophages with dendritic morphology can be  
608 seen outside the vessel, the majority of the macrophages resides inside the vessel, clearly having a  
609 rounded morphology. **S4 Video** provides the stacks used for the orthogonal views.

610 ***T. carassii* infection triggers the formation of foamy macrophages in high-infected**  
611 **fish**

612 When analysing macrophage morphology and location, clear differences could be observed  
613 between control and high- or low-infected larvae when examined in greater detail. In  
614 control fish, macrophages generally exhibited an elongated and dendritic morphology,  
615 were very rarely observed inside the vessel and were mostly located along the vessel  
616 endothelium, in the tissue lining the cardinal vessels or in the ventral fin (**Fig 8A**, left). A  
617 similar morphology and distribution were observed in low-infected larvae (not shown).  
618 Strikingly, in high-infected larvae, we consistently observed large, dark, granular and  
619 round macrophages located almost exclusively inside the cardinal vein on the dorsal  
620 luminal side. These dark macrophages were clearly visible already in bright field images  
621 due to their size, colour and location, and could be present as single cells or as aggregates  
622 (**Fig 8A**, right). The occurrence of these large macrophages increased with the progression  
623 of the infection and were exclusive to high-infected individuals (**S5 Video**) as were never  
624 observed in low-infected or control larvae.

625 The rounded morphology, size and dark appearance of these cells was reminiscent of that  
626 of foamy macrophages. Therefore, to further investigate the nature of these cells, the  
627 green fluorescent fatty acid BODIPY-FLC5 was used to track lipid accumulation in infected  
628 larvae (**Fig 8B**). Interestingly, administration of BODIPY-FL5 in high-infected larvae, one  
629 day prior to the expected appearance of the large macrophages, revealed the accumulation  
630 of lipids in these cells (**S6 Video**). Macrophages without this large, dark, granular  
631 appearance did not show lipid accumulation. This result therefore confirms that the large,  
632 rounded, granular macrophages in the cardinal caudal vein are indeed foamy  
633 macrophages.

Macrophages and neutrophils response to trypanosome infections in zebrafish

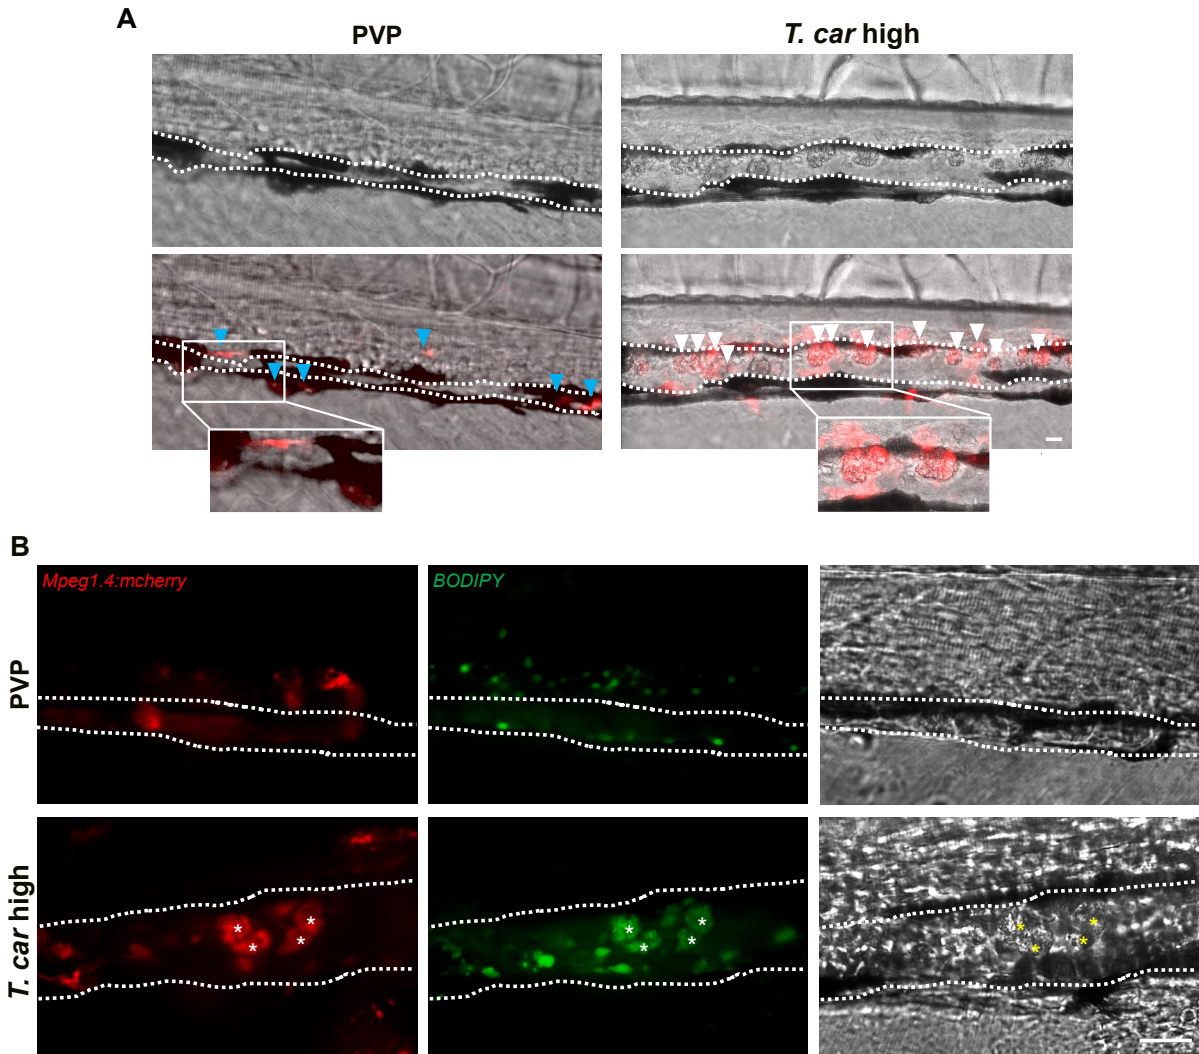

634

635

636

637

638

639

640

641

642

643

644

645

**Fig 8. The large macrophages inside the cardinal caudal vein of high-infected zebrafish are foamy macrophages. A)** *Tg(mpeg1.4:mCherry-F; mpx:GFP)* zebrafish larvae were infected intravenously at 5 dpf with  $n=200$  *T. carassii* or with PVP ( $n=5$  larvae per group) and imaged at 7 dpi using an Andor Spinning Disc Confocal Microscope at a 20x magnification. Representative images from three independent experiments are shown, with blue arrowheads pointing at macrophages outside the vessel and white arrowheads indicating large round macrophages inside the cardinal vein (dashed line). Scale bar indicates 25  $\mu\text{m}$ . **B)** *Tg(mpeg1.4:mCherry-F)* were treated as in A ( $n=5$  larvae per group). At 3 dpi, larvae received 1 nl of 30  $\mu\text{M}$  BODIPY-FLC5 and were imaged 18-20 hours later using a Roper Spinning Disc Confocal Microscope at a 40x magnification. Representative images from three independent experiments are shown. Scale bar indicates 25  $\mu\text{m}$ . **S6 Video** provides the stacks used in B.

Macrophages and neutrophils response to trypanosome infections in zebrafish

646 **Foamy macrophages have a pro-inflammatory activation state**

647 To further investigate the activation state of foamy macrophages, we made use of the  
648 *Tg(tnfa:eGFP-F;mpeg1.4:mCherry-F)* and *Tg(il1b:eGFP-F x mpeg1.4:mCherry-F)* double  
649 transgenic zebrafish lines, having macrophages in red and *tnfa*- or *Il1b*-expressing cells in  
650 green (**Fig 9** and **Fig 10**). We first focused on the time point at which the foamy  
651 macrophages were most clearly present in highly infected individuals, 4 dpi. Our results  
652 clearly show that all large foamy macrophages, were strongly positive for *tnfa*, suggesting  
653 an inflammatory activation state (**Fig 9A**). Interestingly, not only the large foamy  
654 macrophages within the vessel, but also dendritic or lobulated macrophages outside or  
655 lining the vessel showed various degrees of activation. Macrophages that were still partly  
656 in the vessel (**Fig 9B**, yellow arrowhead) displayed higher *tnfa* expression than  
657 macrophages lining the outer endothelium (white arrow heads). This could suggest that  
658 the presence of *T. carassii* components within the vessels might trigger macrophage  
659 activation.

660 Similar to what observed for *tnfa* expression, all foamy macrophages within the vessel  
661 were also positive for *il1b* (**Fig 9C**, asterisk), confirming their pro-inflammatory profile.  
662 Interestingly, not only macrophages but also endothelial cells (a selection is indicated by  
663 white arrows) were strongly positive for *il1b*. Outside the vessel, cells that were mCherry  
664 negative but strongly positive for *Il1b* could also be observed (**Fig 9C**, blue arrow); given  
665 their position outside the vessel, these are most likely neutrophils. Altogether these data  
666 indicate that foamy macrophages occur in high-infected larvae and have a strong pro-  
667 inflammatory profile.



Macrophages and neutrophils response to trypanosome infections in zebrafish

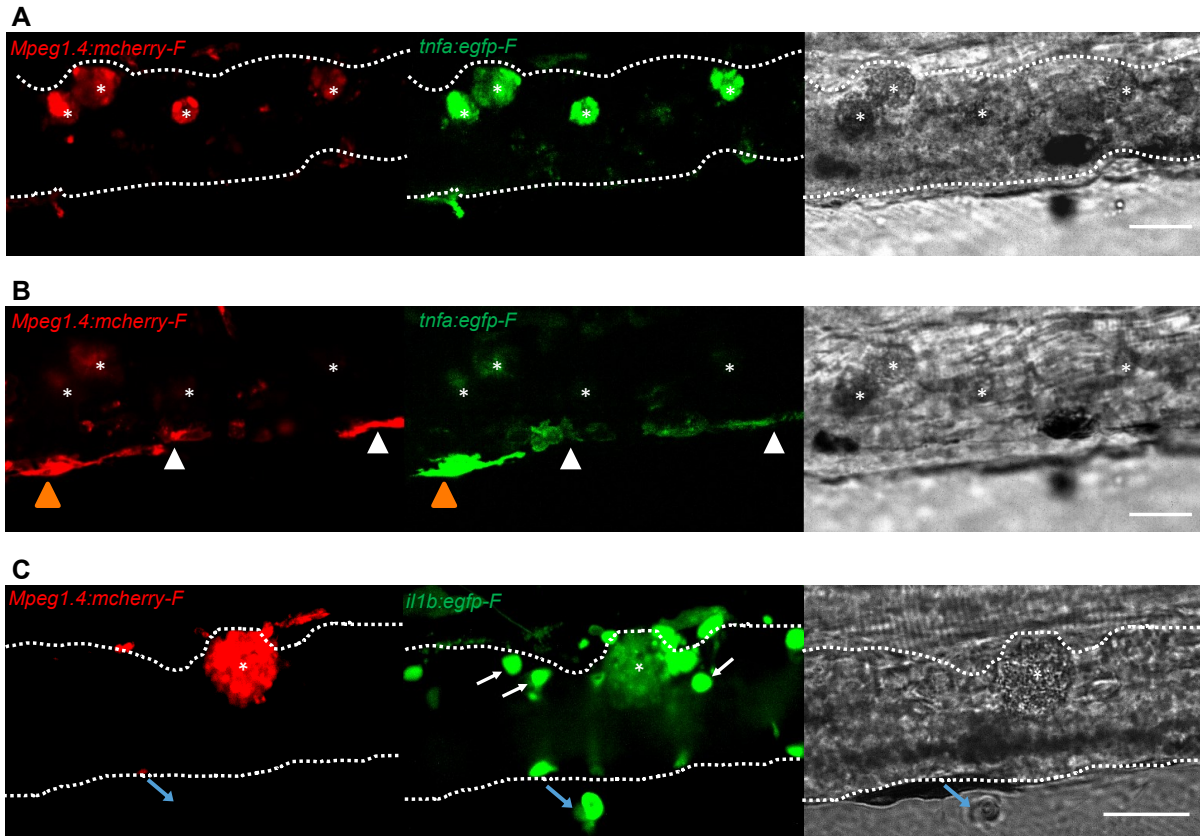

668  
669  
670  
671  
672  
673  
674  
675  
676  
677  
678  
679  
680  
681  
682

**Fig 9. Foamy macrophages have an inflammatory profile.**

*Tg(tnfa:eGFP-F;mpeg1.4:mCherry-F)* **A-B** or *Tg(il1b:eGFP-F x mpeg1.4:mcherry-F)* **C** zebrafish larvae (5dpf), were injected with n=200 *T. carassii* or with PVP. At 4 dpi, high-infected individuals were imaged with an Andor **(A-B)** or Roper **(C)** Spinning Disk Confocal Microscope using 40x magnification. Scale bar indicates 25 μm. Foamy macrophages (asterisks) were easily identified within the cardinal caudal vessel (dashed lines) and were strongly positive for *tnfa* **(A)** and *il1b* **(C)** expression (GFP signal). **B** Same as in A, but a few stacks up, focusing on the cells lining the endothelium. Macrophages that were partly inside and partly outside the vessel (yellow arrowhead) were also strongly positive for *tnfa*, whereas macrophages lining the outer endothelium had a lower *tnfa* expression (white arrowheads). **C** A foamy macrophage (asterisk) within the cardinal caudal vessel (dashed lines) was positive for *il1b*. Endothelial cells were also strongly positive for *il1b*, a selection of which is indicated by white arrows. A mCherry-negative-Il1b positive cell is present outside the vessel (blue arrow). Given its position, it is likely to be a neutrophil.

Macrophages and neutrophils response to trypanosome infections in zebrafish

683 **High-infected zebrafish have a strong inflammatory profile associated with**  
684 **susceptibility to infection**

685 When comparing the overall inflammatory state in high- and low-infected larvae it was  
686 apparent that high-infected individuals generally exhibited a higher pro-inflammatory  
687 response (**Fig 10**). Although *tnfa*- and *il1b*-positive macrophages could be seen in low-  
688 infected individuals, these were generally few (**Fig 10A** and **10B**, middle panels) and a  
689 higher number of *tnfa*- and *il1b*-expressing cells was observed in high-infected larvae (**Fig**  
690 **10A** and **10B**, right panels). In these fish, *il1b* and *tnfa* expression was observed not only  
691 in (foamy) macrophages (asterisk), but also in mCherry negative cells outside the vessel  
692 (blue arrow, likely neutrophils) and in endothelial cells lining the vessel (bright green). As  
693 mentioned earlier, high-infected individuals are not able to control parasitaemia and  
694 generally succumbed to the infection. Altogether, these results suggest that in high-  
695 infected individuals, uncontrolled parasitaemia leads to an exacerbated pro-inflammatory  
696 response leading to susceptibility to the infection. Low-infected individuals however, with  
697 increased macrophage number and moderate cytokine responses, are able to control  
698 parasitaemia and to recover from the infection.

Macrophages and neutrophils response to trypanosome infections in zebrafish

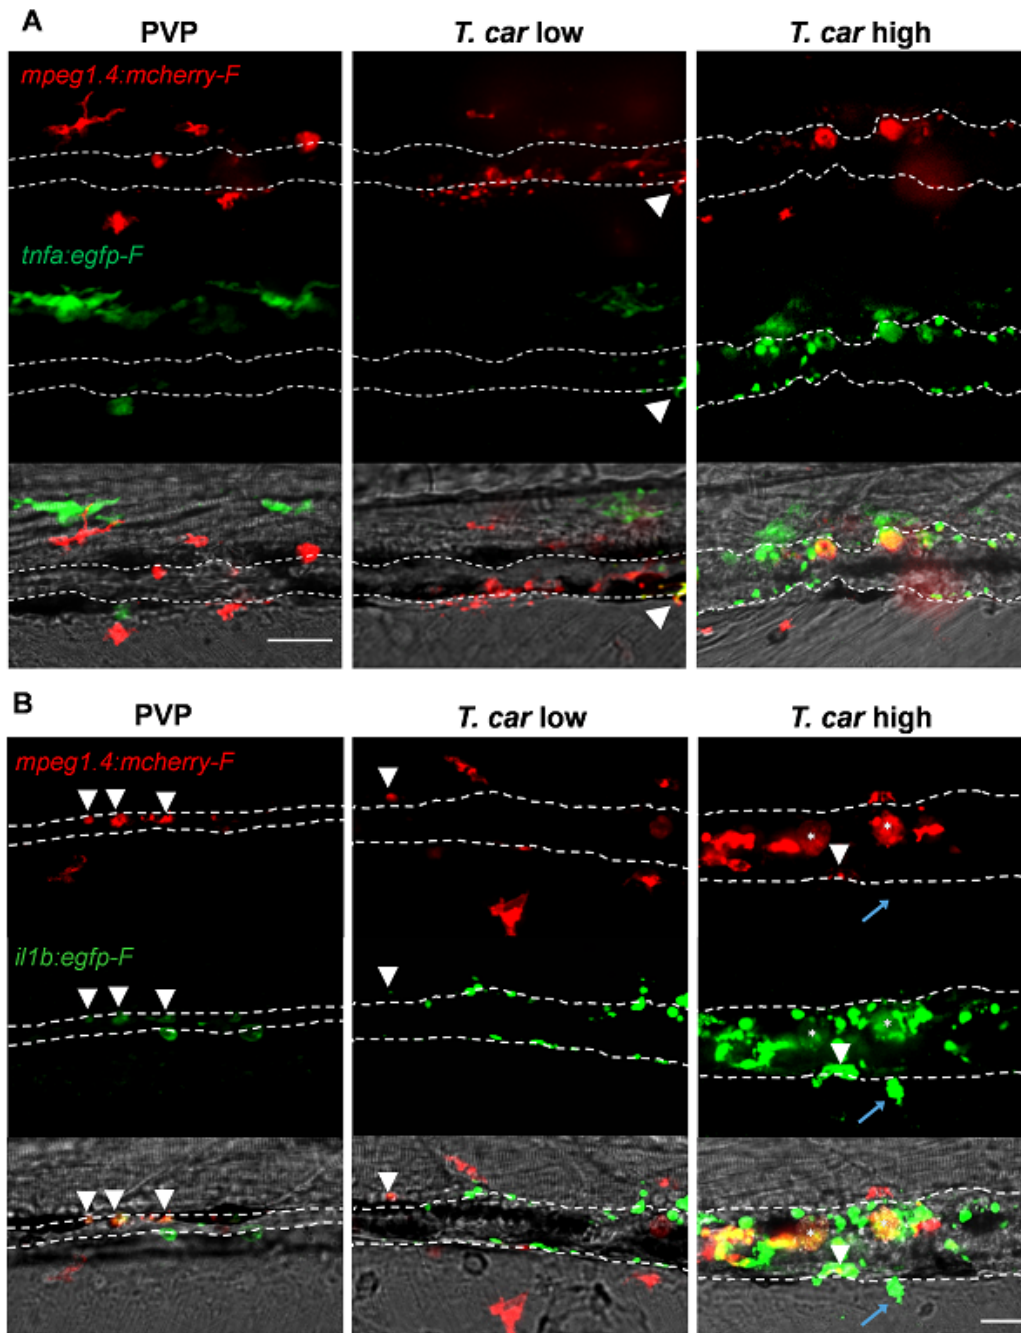

699

700

701

702

703

704

705

706

707

708

709

710

711

712

713

714

715

716

717

**Fig 10. High-infected zebrafish have a strong inflammatory profile.**

Zebrafish larvae (5 dpf), either (A) *Tg(tnfa:eGFP-F x mpeg1.4:mCherry-F)* (n= 8-13 larvae per group from four independent experiments), or (B) *Tg(il1b:eGFP-F; mpeg1.4:mCherry-F)* (n=7-8 larvae per group from two independent experiments), were infected as described in Fig 7. At 3 dpi, larvae were separated in high- and low-infected individuals and at 4 dpi imaged with a Roper Spinning Disk Confocal Microscope. Scale bar indicate 25  $\mu$ m. **A)** In non-infected PVP controls (left panel), several macrophages can be observed outside the vessel but none was positive for *tnfa*. In low-infected individuals (middle panel) macrophages were present inside and outside the vessel. Except the occasional macrophage showing *tnfa-egfp* expression (white arrowhead), they generally did not exhibit strong GFP signal. In high-infected individuals however, foamy macrophages (asterisks) as well as endothelial cells (bright green cells) or other leukocytes, were strongly positive for *tnfa-egfp* expression. **B)** *il1b-egfp* expression was generally low in non-infected PVP controls. In low-infected larvae *il1b* positive macrophages were rarely observed (white arrowhead). In both high- and low-infected fish, some endothelium cells in the cardinal caudal vein show high *il1b-egfp* expression (bright green cells in middle and right panel). In high-infected individual however (right panel), foamy macrophages inside the vessel (asterisks) as well as other macrophages lining the vessel (white arrowhead) and leukocytes in the tissue (blue arrow), were positive for *il1b-egfp* expression.



718 **Discussion**

719

720 In this study we describe the differential response of macrophages and neutrophils *in vivo*,  
721 during the early phase of trypanosome infection of larval zebrafish. Considering the  
722 prominent role of innate immune factors in determining the balance between pathology  
723 and control of first-peak parasitaemia in mammalian models of trypanosomiasis (Magez  
724 and Caljon, 2011; Radwanska et al., 2018; Stijlemans et al., 2017), the use of transparent  
725 zebrafish larvae, devoid of a fully developed adaptive immune system, allowed us to  
726 investigate the early events of the innate immune response to *T. carassii* infection *in vivo*.  
727 After having established a clinical scoring system of infected larvae, we were able to  
728 consistently differentiate high- and low-infected individuals, each associated with opposing  
729 susceptibility to the infection. In high-infected larvae, which fail to control first-peak  
730 parasitaemia, we observed a strong inflammatory response associated with the occurrence  
731 of foamy macrophages and susceptibility to the infection. Conversely, in low-infected  
732 individuals, which succeeded in controlling parasitaemia, we observed a moderate  
733 inflammatory response associated with resistance to the infection. Altogether these data  
734 confirm that also during trypanosome infection of zebrafish, innate immunity is sufficient  
735 to control first-peak parasitaemia and that a controlled inflammatory response is beneficial  
736 to the host.

737 Using transgenic lines marking macrophages and neutrophils, total cell fluorescence and  
738 cell proliferation analysis revealed that *T. carassii* infection triggers macrophage  
739 proliferation, particularly in low-infected individuals. Although to a much lesser extent,  
740 neutrophils also responded to the infection by proliferating. The total number of neutrophils  
741 however, was comparatively low and likely did not contribute to the total cell fluorescence  
742 measured in our whole larvae analysis. Although neutrophils were recently implicated in  
743 promoting the onset of tsetse fly-mediated trypanosome infections in mouse dermis,  
744 macrophage-derived immune mediators, such as NO and TNF $\alpha$  were confirmed to played  
745 a more prominent role in the control of first-peak parasitaemia and in the regulation of the  
746 overall inflammatory response (Caljon et al., 2018).

747 The observation that in low-infected individuals the number of macrophages was  
748 significantly increased by 4-5 dpi, the time point at which clear differences in parasitaemia  
749 were apparent between the two infected groups, suggests a role for macrophages, or for  
750 macrophage-derived factors in first-peak parasitaemia control. Phagocytosis however, can  
751 be excluded as one of the possible contributing factors since motile *T. carassii*, similar to  
752 other extracellular trypanosomes (Caljon et al., 2018; Saeij et al., 2003; Scharsack et al.,  
753 2003), cannot be engulfed by any innate immune cell. A strong inflammatory response is  
754 also not required for trypanosomes control, since in low-infected individuals, only moderate  
755 *il1b* or *tnfa* expression was observed, mostly in macrophages, as assessed using transgenic

Macrophages and neutrophils response to trypanosome infections in zebrafish

756 zebrafish reporter lines. Our data are in agreement with several previous studies using  
757 trypanoresistant (BALB/c) or trypanosusceptible (C57Bl/6) mice that revealed the double-  
758 edge sword of pro-inflammatory mediators such as TNF $\alpha$  or IFN $\gamma$  during trypanosome  
759 infection in mammalian models (reviewed by Radwanska et al., 2018; Stijlemans et al.,  
760 2007). These studies showed that a timely but controlled expression of IFN $\gamma$ , TNF $\alpha$  and  
761 NO, contributed to trypanosomes control via direct (Daulouede et al., 2001; F Iraqi et al.,  
762 2001; Lucas et al., 1994) or indirect mechanisms (Kaushik et al., 1999; Magez et al., 2007,  
763 2006; Mansfield and Paulnock, 2005; Namangala et al., 2001; Noël et al., 2002).  
764 Conversely, in individuals in which an uncontrolled inflammatory response took place,  
765 immunosuppression and inflammation-related pathology occurred (Namangala et al.,  
766 2009, 2001; Noël et al., 2004; Stijlemans et al., 2016). The stark contrast between the  
767 mild inflammatory response observed in low-infected individuals and the exacerbated  
768 response observed in high-infected larvae, strongly resembles the opposing responses  
769 generally observed in trypanoresistant or trypanosusceptible animal models. Owing to the  
770 possibility to monitor the infection at the individual level, it was possible to observe such  
771 responses within one population of outbred zebrafish larvae. Although we were unable to  
772 investigate the specific role of *Tnfa* during *T. carassii* infection of zebrafish, due to the  
773 unavailability of *tnfa*<sup>-/-</sup> zebrafish lines or the unsuitability of morpholinos for transient  
774 knock-down at late stages of development, we previously reported that recombinant  
775 zebrafish (as well as carp and trout) *Tnfa*, are all able to directly lyse *T. brucei* (Forlenza  
776 et al., 2009). In the same study, we reported that also during *Trypanoplasma borreli*  
777 (kinetoplastid) infection of common carp, soluble as well as transmembrane carp *Tnfa* play  
778 a crucial role in both trypanosome control and susceptibility to the infection. Thus,  
779 considering the evolutionary conservation of the lectin-like activity among vertebrate's  
780 TNF $\alpha$  (Daulouede et al., 2001; Forlenza et al., 2009; R Lucas et al., 1994; Magez et al.,  
781 1997) it is possible that the direct lytic activity of zebrafish *Tnfa* may have played a role in  
782 the control of first-peak parasitaemia in low-infected individuals. In the future, using *tnfa*<sup>-/-</sup>  
783 zebrafish lines, possibly in combination with *ifn $\gamma$*  reporter or *ifn $\gamma$* <sup>-/-</sup> lines, it will be  
784 possible to investigate in detail the relative contribution of these inflammatory mediators  
785 in the control of parasitaemia as well as onset of inflammation.

786 There are multiple potential explanations for the inability of high-infected larvae to control  
787 parasitaemia and the overt inflammatory response. Using various comparative mice  
788 infection models, it became apparent that while TNF $\alpha$  production is required for  
789 parasitaemia control, a timely shedding of TNF $\alpha$  Receptor-2 (TNFR2) is necessary to limit  
790 TNF $\alpha$ -mediated infection-associated immunopathology (Radwanska et al., 2018).  
791 Furthermore, during *T. brucei* infection in mice and cattle, continuous cleavage of  
792 membrane Glycosyl-phosphatidyl-inisitol (GPI)-anchored VSG (mVSG-GPI) leads to  
793 shedding of the soluble VSG-GIP (sVSG-GPI), while the di-myristoyl-glycerol compound

Macrophages and neutrophils response to trypanosome infections in zebrafish

794 (DMG) is left in the membrane. While the galactose-residues of sVSG-GPI constituted the  
795 minimal moiety required for optimal TNF $\alpha$  production, the DMG compound of mVSG  
796 contributed to macrophage overactivation (TNF $\alpha$  and IL-1 $\beta$  secretion) (Magez et al., 2002,  
797 1998; Sileghem et al., 2001). Although *T. carassii* was shown to possess a surface  
798 dominated by GPI-anchored carbohydrate-rich mucin-like glycoproteins, not subject to  
799 antigenic variation (LISCHKE et al., 2000; Overath et al., 2001), components of its  
800 excreted/secreted proteome, together with phospholipase C-cleaved GPI-anchored surface  
801 proteins, have all been shown to play a role in immunogenicity (Joerink et al., 2007),  
802 inflammation (Oladiran and Belosevic, 2010, 2009; Ribeiro et al., 2010) as well as  
803 immunosuppression (Oladiran and Belosevic, 2012). Thus, the overactivation caused by  
804 the presence of elevated levels of pro-inflammatory trypanosome-derived moieties,  
805 combined with the lack of a timely secretion of regulatory molecules (e.g. soluble TNFR2)  
806 that could control the host response, may have all contributed to the exacerbated  
807 inflammation observed in high-infected individuals.

808 Given the differential response observed in low- and high-infected individuals, especially  
809 with respect to macrophage distribution and activation, we attempted to investigate the  
810 specific role of macrophages in the protection or susceptibility to *T. carassii* infection. To  
811 this end, the use of a cross between the *Tg(mpeg1:Gal4FF)<sup>g12</sup>* (Ellett et al., 2011) and the  
812 *Tg(UAS-E1b:Eco.NfsB-mCherry)<sup>c26</sup>* (Davison et al., 2007) line, which would have allowed  
813 the timed metronidazole (MTZ)-mediated depletion of macrophages in zebrafish larvae,  
814 was considered. Unfortunately, *in vitro* analysis of the effect of MTZ on the trypanosome  
815 itself, revealed that trypanosomes are susceptible to MTZ, rendering the *nfsB* line not  
816 suitable to investigate the role of macrophages (nor neutrophils) during this particular type  
817 of infection. Alternatively, we attempted to administer liposome-encapsulated clodronate  
818 (Lipo-clodronate) as described previously (Nguyen-Chi et al., 2017; Phan et al., 2018;  
819 Travnickova et al., 2015). In our hands however, administration of 5 mg/ml Lipo-  
820 clodronate (3 nl) to 5 dpf larvae (instead of 2-3 dpf larvae), led to the rapid development  
821 of oedema.

822 Besides differences between the overall macrophage and neutrophil (inflammatory)  
823 response, the differential distribution of these cells was also investigated *in vivo* during  
824 infection utilising the transparency of the zebrafish and the availability of transgenic lines  
825 marking the vasculature. Neutrophils were never observed inside the cardinal caudal vein  
826 although in infected individuals they were certainly recruited and were observed in close  
827 contact with the outer vessel's endothelium. Conversely, macrophages could be seen both  
828 outside and inside the vessel and the total proportion differed between high- and low-  
829 infected individuals. While in low-infected individuals the majority of macrophages  
830 recruited to the cardinal caudal vein remained outside the vessel in close contact with the  
831 endothelium, in high-infected individuals the majority of macrophages were recruited

Macrophages and neutrophils response to trypanosome infections in zebrafish

832 inside the caudal vein and were tightly attached to the luminal vessel wall. To our  
833 knowledge, such detailed description of the relative (re)distribution of neutrophils and  
834 macrophages, *in vivo*, during a trypanosome infection, has not been reported before.  
835 Interestingly, exclusively in high-infected individuals, by 4 dpi large, round, dark and  
836 granular cells were observed, already under the bright field view, in the lumen of the  
837 cardinal caudal vein. These cells were confirmed to be foamy macrophages with high  
838 cytoplasmic lipid content. Foam cells, or foamy macrophages have been named after the  
839 lipid bodies accumulated in their cytoplasm leading to their typical enlarged morphological  
840 appearance (Dvorak et al., 1983), but are also distinguished by the presence of diverse  
841 cytoplasmic organelles (Melo et al., 2003). They have been associated with several  
842 (intracellular) infectious diseases, including Leishmaniasis, Chagas disease, experimental  
843 malaria, toxoplasmosis and tuberculosis, (reviewed in (López-Muñoz et al., 2018; Vallochi  
844 et al., 2018)) but never before with (extracellular) trypanosome infection. For example,  
845 during *T. cruzi* infection of rat, increased numbers of activated monocytes or macrophages  
846 were reported in the blood or heart (Melo and Machado, 2001). Interestingly, trypanosome  
847 uptake was shown to directly initiate the formation of lipid bodies in macrophages, leading  
848 to the appearance of foamy macrophages (D'Avila et al., 2011). During human  
849 *Mycobacterium tuberculosis* infections, foamy macrophages play a role in sustaining the  
850 presence of bacteria and contribute to tissue cavitation enabling the spread of the infection  
851 (Russell et al., 2009). Independently of the disease, it is clear that foamy macrophages  
852 are generally associated with inflammation, since their cytoplasmic lipid bodies are a source  
853 of eicosanoids, strong mediators of inflammation (Melo et al., 2006; Wymann and  
854 Schneider, 2008). In turn, inflammatory mediators such as Prostaglandin E2 benefit  
855 trypanosome survival, as shown in *Trypanosoma*, *Leishmania*, *Plasmodium*, and  
856 *Toxoplasma* infections (reviewed in Vallochi et al., 2018). Our results are consistent with  
857 these reports as we show the occurrence of foamy macrophages exclusively in individuals  
858 that developed high parasitaemia, characterized by a strong pro-inflammatory response,  
859 and ultimately succumbed to the infection. Although we did not systematically investigate  
860 the exact kinetics of parasitaemia development in correlation with foamy macrophages  
861 occurrence, during our *in vivo* monitoring, we consistently observed that the increase in  
862 trypanosome number preceded the appearance of foamy macrophages. It is possible that,  
863 in high-infected individuals, foamy macrophages are formed due to the necessity to clear  
864 the increasing concentration of circulating trypanosome-derived moieties or of dying  
865 trypanosomes. The interaction with trypanosome-derived molecules, including soluble  
866 surface (glyco)proteins or trypanosome DNA, may not only be responsible for the activation  
867 of pro-inflammatory pathways, but also for a change in cell metabolism. The occurrence of  
868 foamy macrophages has been reported for intracellular trypanosomatids (*T. cruzi*,  
869 *Leishmania*), and arachidonic acid-derived lipids were reported to act as regulators of the

## Macrophages and neutrophils response to trypanosome infections in zebrafish

870 host immune response and trypanosome burden during *T. brucei* infections (López-Muñoz  
871 et al., 2018). To our knowledge our study is the first to report the presence of foamy  
872 macrophages during an extracellular trypanosome infection.

873 The possibility to detect the occurrence of large, granular cells already in the bright field  
874 and the availability of transgenic lines that allowed us to identify these cells as  
875 macrophages, further emphasizes the power of the zebrafish model. It allowed us to  
876 visualise *in vivo*, in real time, not only their occurrence but also their differential distribution  
877 with respect to other macrophages or neutrophils. Observations that we might have missed  
878 if we for example were to bleed an animal, perform immunohistochemistry or gene  
879 expression analysis. Thus, the possibility to separate high- and low-infected animals  
880 without the need to sacrifice them, allowed us to follow at the individual level the  
881 progression of the infection and the ensuing differential immune response.

882 In the future it will be interesting to analyse the transcription profiles of sorted macrophage  
883 populations from low- and high-infected larvae. Given the marked heterogeneity in  
884 macrophage activation observed especially within high-infected individuals, single-cell  
885 transcriptome analysis, of foamy macrophages in particular, may provide insights in the  
886 differential activation state of the various macrophage phenotypes. Furthermore, the  
887 zebrafish has already emerged as a valuable animal model to study inflammation and host-  
888 pathogen interaction and can be a powerful complementary tool to examine macrophage  
889 plasticity and polarization *in vivo*, by truly reflecting the complex nature of the environment  
890 during an ongoing infection in a live host. Finally, the availability of (partly) transparent  
891 adult zebrafish lines (Antinucci and Hindges, 2016; White et al., 2008), may aid the *in vivo*  
892 analysis of macrophage activation in adult individuals.

893 Altogether, in this study we describe the innate immune response of zebrafish larvae to *T.*  
894 *carassii* infection. The transparency and availability of various transgenic zebrafish lines,  
895 enabled us to establish a clinical scoring system that allowed us to monitor parasitaemia  
896 development and describe the differential response of neutrophils and macrophages at the  
897 individual level. Interestingly, for the first time in an extracellular trypanosome infection,  
898 we report the occurrence of foamy macrophages, characterized by a high lipid content and  
899 strong inflammatory profile, associated with susceptibility to the infection. Our model paves  
900 the way to investigate which mediators of the trypanosomes are responsible for the  
901 induction of such inflammatory response as well as study the condition that lead to the  
902 formation of foamy macrophages *in vivo*.

903

### 904 **Acknowledgments**

905 This work was supported by the FishForPharma FP7 People: Marie Curie Initial Training  
906 Network, project number PITN-GA-2011-289209 and by the Dutch Research Council  
907 (NWO), project number 022.004.005. Dr. Christelle Langevin from Institut National de la



Macrophages and neutrophils response to trypanosome infections in zebrafish

908 Recherche Agronomique (INRA) is greatly acknowledged for her assistance with  
909 immunohistochemical analysis. The authors like to thank Dr. Danilo Pietretti, Marleen  
910 Scheer, and Dr. Sylvia Brugman from the Cell Biology and Immunology Group of  
911 Wageningen University & Research (WUR) for technical support with the RQ-PCR analysis,  
912 parasite isolation and for fruitful discussions; the CARUS Aquatic Research Facility of WUR  
913 is acknowledged for fish rearing and husbandry. Prof. Mark Carrington, Cambridge  
914 University, is acknowledged for the fruitful discussions and for revising the manuscript.  
915 Furthermore, the authors like to thank Dr. Norbert de Ruijter from the Wageningen Light  
916 Microscopy Centre, and the Montpellier Resources Imagerie facility for their assistance.

917

918 **References**

- 919 Antinucci P, Hindges R. 2016. A crystal-clear zebrafish for in vivo imaging. *Sci Rep* **6**.  
920 doi:10.1038/srep29490
- 921 Baral TN, De Baetselier P, Brombacher F, Magez S. 2007. Control of Trypanosoma evansi Infection  
922 Is IgM Mediated and Does Not Require a Type I Inflammatory Response. *J Infect Dis*  
923 **195**:1513–1520. doi:10.1086/515577
- 924 Benard EL, Racz PI, Rougeot J, Nezhinsky AE, Verbeek FJ, Spaink HP, Meijer AH. 2015.  
925 Macrophage-expressed perforins Mpeg1 and Mpeg1.2 have an anti-bacterial function in  
926 zebrafish. *J Innate Immun* **7**:136–152. doi:10.1159/000366103
- 927 Bertrand JY, Chi NC, Santoso B, Teng S, Stainier DYR, Traver D. 2010. Haematopoietic stem cells  
928 derive directly from aortic endothelium during development. *Nature* **464**:108–111.  
929 doi:10.1038/nature08738
- 930 Boada-Sucre AA, Rossi Spadafora MS, Tavares-Marques LM, Finol HJ, Reyna-Bello A. 2016.  
931 Trypanosoma vivax Adhesion to Red Blood Cells in Experimentally Infected Sheep. *Patholog*  
932 *Res Int* **2016**. doi:10.1155/2016/4503214
- 933 Caljon G, Mabile D, Stijlemans B, Trez C De, Mazzone M, Tacchini-cottier F, Malissen M,  
934 Ginderachter JA Van, Magez S, Baetselier P De, Abbeele J Van Den. 2018. Neutrophils  
935 enhance early Trypanosoma brucei infection onset 1–11. doi:10.1038/s41598-018-29527-y
- 936 Chi NC, Shaw RM, Val S De, Kang G, Jan LY, Black BL, Stainier DYR. 2008. Expression and  
937 Atrioventricular Canal Formation. *Genes Dev* 734–739. doi:10.1101/gad.1629408.734
- 938 Cnops J, De Trez C, Stijlemans B, Keirsse J, Kauffmann F, Barkhuizen M, Keeton R, Boon L,  
939 Brombacher F, Magez S. 2015. NK-, NKT- and CD8-Derived IFN $\gamma$  Drives Myeloid Cell  
940 Activation and Erythrophagocytosis, Resulting in Trypanosomosis-Associated Acute Anemia.  
941 *PLoS Pathog* **11**. doi:10.1371/journal.ppat.1004964
- 942 Collier SP, Mansfield JM, Paulnock DM. 2003. Glycosylinositolphosphate Soluble Variant Surface  
943 Glycoprotein Inhibits IFN- $\gamma$ -Induced Nitric Oxide Production Via Reduction in STAT1  
944 Phosphorylation in African Trypanosomiasis. *J Immunol* **171**:1466–1472.  
945 doi:10.4049/jimmunol.171.3.1466
- 946 Cronan MR, Tobin DM. 2014. Fit for consumption: zebrafish as a model for tuberculosis. *Dis Model*  
947 *Mech*. doi:10.1242/dmm.016089
- 948 D'Avila H, Freire-de-Lima CG, Roque NR, Teixeira L, Barja-Fidalgo C, Silva AR, Melo RCN, DosReis  
949 GA, Castro-Faria-Neto HC, Bozza PT. 2011. Host cell lipid bodies triggered by Trypanosoma  
950 cruzi infection and enhanced by the uptake of apoptotic cells are associated with  
951 prostaglandin E2 generation and increased parasite growth. *J Infect Dis* **204**:951–961.  
952 doi:10.1093/infdis/jir432
- 953 Daulouede S, Bouteille B, Moynet D, De Baetselier P, Courtois P, Lemesre JL, Buguet A, Cespuglio  
954 R, Vincendeau P. 2001. Human macrophage tumor necrosis factor (TNF)-alpha production  
955 induced by Trypanosoma brucei gambiense and the role of TNF-alpha in parasite control. *J*  
956 *Infect Dis* **183**:988–991.
- 957 Davison JM, Akitake CM, Goll MG, Rhee JM, Gosse N, Baier H, Halpern ME, Leach SD, Parsons MJ.  
958 2007. Transactivation from Gal4-VP16 transgenic insertions for tissue-specific cell labeling  
959 and ablation in zebrafish. *Dev Biol* **304**:811–824. doi:10.1016/j.ydbio.2007.01.033
- 960 Dóro É, Jacobs SH, Hammond FR, Schipper H, Pieters RP, Carrington M, Wiegertjes GF, Forlenza M.  
961 2019. Visualizing trypanosomes in a vertebrate host reveals novel swimming behaviours,  
962 adaptations and attachment mechanisms. *Elife* **8**. doi:10.7554/elife.48388

Macrophages and neutrophils response to trypanosome infections in zebrafish

- 963 Dvorak AM, Dvorak HF, Peters SP, Shulman ES, MacGlashan DWJ, Pyne K, Harvey VS, Galli SJ,  
964 Lichtenstein LM. 1983. Lipid bodies: cytoplasmic organelles important to arachidonate  
965 metabolism in macrophages and mast cells. *J Immunol* **131**:2965–2976.
- 966 Ellett F, Pase L, Hayman JW, Andrianopoulos A, Lieschke GJ. 2011. Mpeg1 Promoter Transgenes  
967 Direct Macrophage-Lineage Expression in Zebrafish. *Blood* **117**:e49–e56. doi:10.1182/blood-  
968 2010-10-314120
- 969 Engstler M, Pfohl T, Herminghaus S, Boshart M, Wiegertjes G, Heddergott N, Overath P. 2007.  
970 Hydrodynamic Flow-Mediated Protein Sorting on the Cell Surface of Trypanosomes. *Cell*  
971 **131**:505–515. doi:10.1016/j.cell.2007.08.046
- 972 Forlenza M, Kaiser T, Savelkoul HFJ, Wiegertjes GF. 2012. The use of real-time quantitative PCR for  
973 the analysis of cytokine mRNA levels. *Methods in Molecular Biology* (Clifton, N.J.). pp. 7–23.  
974 doi:10.1007/978-1-61779-439-1\_2
- 975 Forlenza M, Magez S, Scharsack JP, Westphal A, Savelkoul HFJ, Wiegertjes GF. 2009. Receptor-  
976 Mediated and Lectin-Like Activities of Carp ( *Cyprinus carpio* ) TNF- $\alpha$ . *J Immunol* **183**:5319–  
977 5332. doi:10.4049/jimmunol.0901780
- 978 García-Valtanen P, Martínez-López A, López-Muñoz A, Bello-Perez M, Medina-Gali RM, Ortega-  
979 Villaizán MDM, Varela M, Figueras A, Mulero V, Novoa B, Estepa A, Coll J. 2017. Zebra fish  
980 lacking adaptive immunity acquire an antiviral alert state characterized by upregulated gene  
981 expression of apoptosis, multigene families, and interferon-related genes. *Front Immunol*  
982 **8**:121. doi:10.3389/fimmu.2017.00121
- 983 Guegan F, Plazolles N, Baltz T, Coustou V. 2013. Erythrophagocytosis of desialylated red blood cells  
984 is responsible for anaemia during Trypanosomavivax infection. *Cell Microbiol* **15**:1285–1303.  
985 doi:10.1111/cmi.12123
- 986 Iraqi F, Sekikawa K, Rowlands J, Teale A. 2001. Susceptibility of tumour necrosis factor-alpha  
987 genetically deficient mice to Trypanosoma congolense infection. *Parasite Immunol* **23**:445–  
988 451.
- 989 Islam A, Woo P. 1991. Anemia and its mechanism in goldfish *Carassius auratus* infected with  
990 Trypanosoma danilewskyi. *Dis Aquat Organ* **11**:37–43. doi:10.3354/dao011037
- 991 Joerink M, Groeneveld A, Ducro B, Savelkoul HFJ, Wiegertjes GF. 2007. Mixed infection with  
992 Trypanoplasma borreli and Trypanosoma carassii induces protection: Involvement of cross-  
993 reactive antibodies. *Dev Comp Immunol* **31**:903–915. doi:10.1016/j.dci.2006.12.003
- 994 Joerink M, Saeij J, Stafford J, Belosevic M, Wiegertjes G. 2004. Animal models for the study of  
995 innate immunity: protozoan infections in fish In: Flik G, Wiegertjes GF, editors. *Host-Parasite*  
996 *Interactions*. Taylor & Francis. p. (55):67–89.
- 997 Kaushik RS, Uzonna JE, Gordon JR, Tabel H. 1999. Innate resistance to Trypanosoma congolense  
998 infections: Differential production of nitric oxide by macrophages from susceptible BALB/c and  
999 resistant C57B1/6 mice. *Exp Parasitol* **92**:131–143. doi:10.1006/expr.1999.4408
- 1000 Kent M, Lom J, Dykova I, Dyková I. 1993. Protozoan Parasites of Fishes. *J Parasitol* **79**:673.  
1001 doi:10.2307/3283600
- 1002 Kovacevic N, Hagen MO, Xie J, Belosevic M. 2015. The analysis of the acute phase response during  
1003 the course of Trypanosoma carassii infection in the goldfish (*Carassius auratus* L.). *Dev Comp*  
1004 *Immunol* **53**:112–122. doi:10.1016/j.dci.2015.06.009
- 1005 Krettli AU, Weisz-Carrington P, Nussenzweig RS. 1979. Membrane-bound antibodies to bloodstream  
1006 Trypanosoma cruzi in mice: Strain differences in susceptibility to complement-mediated lysis.  
1007 *Clin Exp Immunol* **37**:416–423.
- 1008 La Greca F, Haynes C, Stijlemans B, De Trez C, Magez S. 2014. Antibody-mediated control of  
1009 Trypanosoma vivax infection fails in the absence of tumour necrosis factor. *Parasite Immunol*  
1010 **36**:271–276. doi:10.1111/pim.12106
- 1011 Langenau DM, Ferrando AA, Traver D, Kutok JL, Hezel JP, Kanki JP, Zon LI, Look AT, Trede NS.  
1012 2004. In vivo tracking of T cell development, ablation, and engraftment in transgenic  
1013 zebrafish. *Proc Natl Acad Sci U S A* **101**:7369–7374.
- 1014 Lawson ND, Weinstein BM. 2002. In vivo imaging of embryonic vascular development using  
1015 transgenic zebrafish. *Dev Biol* **248**:307–318. doi:10.1006/dbio.2002.0711
- 1016 LISCHKE A, KLEIN C, STIERHOF Y-D, HEMPEL M, MEHLERT A, ALMEIDA IC, FERGUSON MAJ,  
1017 OVERATH P. 2000. Isolation and characterization of glycosylphosphatidylinositol-anchored,  
1018 mucin-like surface glycoproteins from bloodstream forms of the freshwater-fish parasite  
1019 Trypanosoma carassii. *Biochem J* **345**:693. doi:10.1042/0264-6021:3450693
- 1020 López-Muñoz RA, Molina-Berríos A, Campos-Estrada C, Abarca-Sanhueza P, Urrutia-Llancaqueo L,  
1021 Peña-Espinoza M, Maya JD. 2018. Inflammatory and Pro-resolving Lipids in Trypanosomatid  
1022 Infections: A Key to Understanding Parasite Control. *Front Microbiol* **9**:1961.  
1023 doi:10.3389/fmicb.2018.01961
- 1024 Lopez R, Demick KP, Mansfield JM, Paulnock DM. 2008. Type I IFNs Play a Role in Early Resistance,  
1025 but Subsequent Susceptibility, to the African Trypanosomes. *J Immunol* **181**:4908–4917.  
1026 doi:10.4049/jimmunol.181.7.4908



Macrophages and neutrophils response to trypanosome infections in zebrafish

- 1027 Lucas Rudolf, Magez S, De Leys R, Fransen L, Scheerlinck JP, Rampelberg M, Sablon E, De  
1028 Baetselier P. 1994. Mapping the lectin-like activity of tumor necrosis factor. *Science (80- )*  
1029 **263**:814–817. doi:10.1126/science.8303299
- 1030 Lucas R, Magez S, De Leys R, Fransen L, Scheerlinck JP, Rampelberg M, Sablon E, De Baetselier P.  
1031 1994. Mapping the lectin-like activity of tumor necrosis factor. *Science (80- )* **263**:814–817.  
1032 Magez S., Lucas R, Darji A, Bajyana Songa E, Hamers R, Baetselier P de. 1993. Murine tumour  
1033 necrosis factor plays a protective role during the initial phase of the experimental infection  
1034 with *Trypanosoma brucei*. *Parasite Immunol* **15**:635–641. doi:10.1111/j.1365-  
1035 3024.1993.tb00577.x
- 1036 Magez S, Caljon G. 2011. Mouse models for pathogenic African trypanosomes: unravelling the  
1037 immunology of host-parasite-vector interactions. *Parasite Immunol* **33**:423–429.  
1038 doi:10.1111/j.1365-3024.2011.01293.x
- 1039 Magez S, Geuskens M, Beschin A, del Favero H, Verschuere H, Lucas R, Pays E, de Baetselier P.  
1040 1997. Specific uptake of tumor necrosis factor- $\alpha$  is involved in growth control of  
1041 *Trypanosoma brucei*. *J Cell Biol* **137**:715–727.
- 1042 Magez S, Radwanska M, Beschin A, Sekikawa K, De Baetselier P. 1999. Tumor necrosis factor alpha  
1043 is a key mediator in the regulation of experimental *Trypanosoma brucei* infections. *Infect*  
1044 *Immun* **67**:3128–3132.
- 1045 Magez S, Radwanska M, Drennan M, Fick L, Baral TN, Allie N, Jacobs M, Nedospasov S, Brombacher  
1046 F, Ryffel B, Baetselier P De. 2007. Tumor Necrosis Factor (TNF) Receptor-1 (TNFp55) Signal  
1047 Transduction and Macrophage-Derived Soluble TNF Are Crucial for Nitric Oxide-Mediated  
1048 *Trypanosoma congolense* Parasite Killing. *J Infect Dis* **196**:954–962. doi:10.1086/520815
- 1049 Magez S, Radwanska M, Drennan M, Fick L, Baral TN, Brombacher F, De Baetselier P. 2006.  
1050 Interferon- $\gamma$  and nitric oxide in combination with antibodies are key protective host  
1051 immune factors during *Trypanosoma congolense* Tc13 Infections. *J Infect Dis* **193**:1575–  
1052 1583.
- 1053 Magez S, Radwanska M, Stijlemans B, Xong H V, Pays E, De Baetselier P. 2001. A conserved  
1054 flagellar pocket exposed high mannose moiety is used by African trypanosomes as a host  
1055 cytokine binding molecule. *J Biol Chem* **276**:33458–33464.
- 1056 Magez S, Stijlemans B, Baral T, De Baetselier P. 2002. VSG-GPI anchors of African trypanosomes:  
1057 their role in macrophage activation and induction of infection-associated immunopathology.  
1058 *Microbes Infect* **4**:999–1006. doi:10.1016/S1286-4579(02)01617-9
- 1059 Magez S, Stijlemans B, De Baetselier P, Radwanska M, Pays E, Ferguson MAJ. 1998. The glycosyl-  
1060 inositol-phosphate and dimyristoylglycerol moieties of the glycosylphosphatidylinositol anchor  
1061 of the trypanosome variant-specific surface glycoprotein are distinct macrophage-activating  
1062 factors. *J Immunol*.
- 1063 Mansfield JM, Paulnock DM. 2005. Regulation of innate and acquired immunity in African  
1064 trypanosomiasis. *Parasite Immunol* **27**:361–371. doi:10.1111/j.1365-3024.2005.00791.x
- 1065 McAllister M, Phillips N, Belosevic M. 2019. *Trypanosoma carassii* infection in goldfish (*Carassius*  
1066 *auratus* L.): changes in the expression of erythropoiesis and anemia regulatory genes.  
1067 *Parasitol Res* **118**:1147–1158. doi:10.1007/s00436-019-06246-5
- 1068 Melo RC., Machado CR. 2001. *Trypanosoma cruzi*: Peripheral Blood Monocytes and Heart  
1069 Macrophages in the Resistance to Acute Experimental Infection in Rats. *Exp Parasitol* **97**:15–  
1070 23. doi:10.1006/EXPR.2000.4576
- 1071 Melo RCN, D'Ávila H, Fabrino DL, Almeida PE, Bozza PT. 2003. Macrophage lipid body induction by  
1072 Chagas disease in vivo: putative intracellular domains for eicosanoid formation during  
1073 infection. *Tissue Cell* **35**:59–67. doi:10.1016/S0040-8166(02)00105-2
- 1074 Melo RCN, Fabrino DL, Dias FF, Parreira GG. 2006. Lipid bodies: Structural markers of  
1075 inflammatory macrophages in innate immunity. *Inflamm Res* **55**:342–348.  
1076 doi:10.1007/s00011-006-5205-0
- 1077 Mishra RR, Senapati SK, Sahoo SC. 2017. Trypanosomiasis induced oxidative stress and hemato-  
1078 biochemical alteration in cattle. *Artic J Entomol Zool Stud* **5**:721–727.
- 1079 Musoke AJ, Barbet AF. 1977. Activation of complement by variant-specific surface antigen of  
1080 *Trypanosoma brucei*. *Nature* **270**:438–440.
- 1081 Naessens J. 2006. Bovine trypanotolerance: A natural ability to prevent severe anaemia and  
1082 haemophagocytic syndrome? *Int J Parasitol* **36**:521–528. doi:10.1016/j.ijpara.2006.02.012
- 1083 Namangala B, De Baetselier P, Beschin A. 2009. Both Type-I and Type-II Responses Contribute to  
1084 Murine Trypanotolerance. *J Vet Med Sci* **71**:313–318.
- 1085 Namangala B, Noel W, De Baetselier P, Brys L, Beschin A. 2001. Relative contribution of interferon-  
1086 gamma and interleukin-10 to resistance to murine African trypanosomiasis. *J Infect Dis*  
1087 **183**:1794–1800.
- 1088 Nguyen-Chi M, Laplace-Builhé B, Travnickova J, Luz-Crawford P, Tejedor G, Lutfalla G, Kissa K,  
1089 Jorgensen C, Djouad F. 2017. TNF signaling and macrophages govern fin regeneration in

Macrophages and neutrophils response to trypanosome infections in zebrafish

- 1090 zebrafish larvae. *Cell Death Dis* **8**:e2979–e2979. doi:10.1038/cddis.2017.374
- 1091 Nguyen-Chi M, Laplace-Builhe B, Travnickova J, Luz-Crawford P, Tejedor G, Phan QT, Duroux-
- 1092 Richard I, Levraud J-P, Kissa K, Lutfalla G, Jorgensen C, Djouad F. 2015. Identification of
- 1093 polarized macrophage subsets in zebrafish. *Elife* **4**:e07288. doi:10.7554/eLife.07288
- 1094 Nguyen-Chi M, Phan QT, Gonzalez C, Dubremetz J-F, Levraud J-P, Lutfalla G. 2014a. Transient
- 1095 infection of the zebrafish notochord with *E. coli* induces chronic inflammation. *Dis Model Mech*
- 1096 **7**:871–82. doi:10.1242/dmm.014498
- 1097 Nguyen-Chi M, Phan QT, Gonzalez C, Dubremetz J-F, Levraud J-P, Lutfalla G. 2014b. Transient
- 1098 infection of the zebrafish notochord with *E. coli* induces chronic inflammation. *Dis Model Mech*
- 1099 **7**:871–82. doi:10.1242/dmm.014498
- 1100 Noël W, Hassanzadeh G, Raes G, Namangala B, Daems I, Brys L, Brombacher F, Baetselier PD,
- 1101 Beschin A. 2002. Infection stage-dependent modulation of macrophage activation in
- 1102 *Trypanosoma congolense*-resistant and -susceptible mice. *Infect Immun* **70**:6180–6187.
- 1103 Noël W, Raes G, Ghassabeh GH, De Baetselier P, Beschin A. 2004. Alternatively activated
- 1104 macrophages during parasite infections. *Trends Parasitol* **20**:126–133.
- 1105 doi:10.1016/j.pt.2004.01.004
- 1106 O’Gorman GM, Park SDE, Hill EW, Meade KG, Mitchell LC, Agaba M, Gibson JP, Hanotte O,
- 1107 Naessens J, Kemp SJ, MacHugh DE. 2006. Cytokine mRNA profiling of peripheral blood
- 1108 mononuclear cells from trypanotolerant and trypanosusceptible cattle infected with
- 1109 *Trypanosoma congolense*. *Physiol Genomics* **28**:53–61.
- 1110 doi:10.1152/physiolgenomics.00100.2006
- 1111 Oladiran A, Beauparlant D, Belosevic M. 2011. The expression analysis of inflammatory and
- 1112 antimicrobial genes in the goldfish (*Carassius auratus* L.) infected with *Trypanosoma carassii*.
- 1113 *Fish Shellfish Immunol* **31**:606–613. doi:10.1016/j.fsi.2011.07.008
- 1114 Oladiran A, Belosevic M. 2012. Recombinant glycoprotein 63 (Gp63) of *Trypanosoma carassii*
- 1115 suppresses antimicrobial responses of goldfish (*Carassius auratus* L.) monocytes and
- 1116 macrophages q. *Int J Parasitol* **42**:621–633. doi:10.1016/j.ijpara.2012.04.012
- 1117 Oladiran A, Belosevic M. 2010. *Trypanosoma carassii* calreticulin binds host complement
- 1118 component C1q and inhibits classical complement pathway-mediated lysis. *Dev Comp*
- 1119 *Immunol* **34**:396–405. doi:10.1016/j.dci.2009.11.005
- 1120 Oladiran A, Belosevic M. 2009. *Trypanosoma carassii* hsp70 increases expression of inflammatory
- 1121 cytokines and chemokines in macrophages of the goldfish (*Carassius auratus* L.). *Dev Comp*
- 1122 *Immunol* **33**:1128–1136. doi:10.1016/j.dci.2009.06.003
- 1123 Overath P, Haag J, Lischke A, O’Hugin C. 2001. The surface structure of trypanosomes in relation
- 1124 to their molecular phylogeny. *Int J Parasitol* **31**:468–471.
- 1125 Overath P, Ruoff J, Stierhof YD, Haag J, Tichy H, Dyková I, Lom J. 1998. Cultivation of bloodstream
- 1126 forms of *Trypanosoma carassii*, a common parasite of freshwater fish. *Parasitol Res* **84**:343–
- 1127 347. doi:10.1007/s004360050408
- 1128 Page DM, Wittamer V, Bertrand JY, Lewis KL, Pratt DN, Delgado N, Schale SE, McGue C, Jacobsen
- 1129 BH, Doty A, Pao Y, Yang H, Chi NC, Magor BG, Traver D. 2013. An evolutionarily conserved
- 1130 program of B-cell development and activation in zebrafish. *Blood* **122**:e1–e11.
- 1131 doi:10.1182/blood-2012-12-471029
- 1132 Palha N, Guivel-Benhassine F, Briolat V, Lutfalla G, Sourisseau M, Ellett F, Wang CH, Lieschke GJ,
- 1133 Herbomel P, Schwartz O, Levraud JP. 2013. Real-Time Whole-Body Visualization of
- 1134 Chikungunya Virus Infection and Host Interferon Response in Zebrafish. *PLoS Pathog*
- 1135 **9**:e1003619. doi:10.1371/journal.ppat.1003619
- 1136 Petrie-Hanson L, Hohn C, Hanson L. 2009. Characterization of rag1 mutant zebrafish leukocytes.
- 1137 *BMC Immunol* **10**:8. doi:10.1186/1471-2172-10-8
- 1138 Phan QT, Sipka T, Gonzalez C, Levraud JP, Lutfalla G, Nguyen-Chi M. 2018. Neutrophils use
- 1139 superoxide to control bacterial infection at a distance. *PLoS Pathog* **14**:1–29.
- 1140 doi:10.1371/journal.ppat.1007157
- 1141 Radwanska M, Vereecke N, Deleuw V, Pinto J, Magez S. 2018. Salivarian Trypanosomiasis: A
- 1142 Review of Parasites Involved, Their Global Distribution and Their Interaction With the Innate
- 1143 and Adaptive Mammalian Host Immune System. *Front Immunol* **9**:1–20.
- 1144 doi:10.3389/fimmu.2018.02253
- 1145 Ramakrishnan L. 2013. The zebrafish guide to tuberculosis immunity and treatment. *Cold Spring*
- 1146 *Harb Symp Quant Biol* **78**:179–192. doi:10.1101/sqb.2013.78.023283
- 1147 Renshaw SA, Loynes CA, Trushell DMI, Elworthy S, Ingham PW, Whyte MKB. 2006. A transgenic
- 1148 zebrafish model of neutrophilic inflammation. *Blood* **108**:3976–3978. doi:10.1182/blood-
- 1149 2006-05-024075
- 1150 Renshaw SA, Trede NS. 2012. A model 450 million years in the making: zebrafish and vertebrate
- 1151 immunity. *Dis Model Mech* **5**:38–47. doi:10.1242/dmm.007138
- 1152 Ribeiro CMS, Pontes MJSL, Bird S, Chadzinska M, Scheer M, Verburg-van Kemenade BML,
- 1153 Savelkoul HFJ, Wiegertjes GF. 2010. Trypanosomiasis-induced Th17-like immune responses in

Macrophages and neutrophils response to trypanosome infections in zebrafish

- 1154 carp. *PLoS One* **5**:e13012. doi:10.1371/journal.pone.0013012
- 1155 Rifkin MR, Landsberger FR. 1990. Trypanosome variant surface glycoprotein transfer to target
- 1156 membranes: A model for the pathogenesis of trypanosomiasis. *Proc Natl Acad Sci U S A*
- 1157 **87**:801–805. doi:10.1073/pnas.87.2.801
- 1158 Rosowski EE, Knox BP, Archambault LS, Huttenlocher A, Keller NP, Wheeler RT, Davis JM. 2018.
- 1159 The zebrafish as a model host for invasive fungal infections. *J Fungi* **4**.
- 1160 doi:10.3390/jof4040136
- 1161 Russell DG, Cardona P-J, Kim M-J, Allain S, Altare F. 2009. Foamy macrophages and the
- 1162 progression of the human tuberculosis granuloma. *Nat Immunol* **10**:943–948.
- 1163 doi:10.1038/ni.1781
- 1164 Saeij JPJ, Groeneveld A, Van Rooijen N, Haenen OLM, Wiegertjes GF. 2003. Minor effect of
- 1165 depletion of resident macrophages from peritoneal cavity on resistance of common carp
- 1166 *Cyprinus carpio* to blood flagellates. *Dis Aquat Organ* **57**:67–75. doi:10.3354/dao057067
- 1167 Scharsack JP, Steinhagen D, Kleczka C, Schmidt JO, Körting W, Michael RD, Leibold W, Schuberth
- 1168 HJ. 2003. Head kidney neutrophils of carp (*Cyprinus carpio* L.) are functionally modulated by
- 1169 the haemoflagellate *Trypanoplasma borreli*. *Fish Shellfish Immunol* **14**:389–403.
- 1170 doi:10.1006/fsim.2002.0447
- 1171 Sileghem M, Saya R, Grab DJ, Naessens J. 2001. An accessory role for the diacylglycerol moiety of
- 1172 variable surface glycoprotein of African trypanosomes in the stimulation of bovine monocytes.
- 1173 *Vet Immunol Immunopathol* **78**:325–339. doi:10.1016/S0165-2427(01)00241-0
- 1174 Simpson AGB, Stevens JR, Lukes J. 2006. The evolution and diversity of kinetoplastid flagellates.
- 1175 *Trends Parasitol* **22**:168–174.
- 1176 Sternberg JM, Mabbott NA. 1996. Nitric oxide-mediated suppression of T cell responses during
- 1177 *Trypanosoma brucei* infection: Soluble trypanosome products and interferon- $\gamma$  are synergistic
- 1178 inducers of nitric oxide synthase. *Eur J Immunol*. doi:10.1002/eji.1830260306
- 1179 Stijlemans B, Caljon G, Van Den Abbeele J, Van Ginderachter JA, Magez S, De Trez C. 2016.
- 1180 Immune evasion strategies of *Trypanosoma brucei* within the mammalian host: Progression to
- 1181 pathogenicity. *Front Immunol*. doi:10.3389/fimmu.2016.00233
- 1182 Stijlemans B, Williams M, Raes G, Beschin A, Magez S, De Baetselier P. 2007. African
- 1183 trypanosomiasis: from immune escape and immunopathology to immune intervention. *Vet*
- 1184 *Parasitol* **148**:3–13.
- 1185 Stijlemans B, Radwanska M, Trez C De, Magez S. 2017. African trypanosomes undermine humoral
- 1186 responses and vaccine development: Link with inflammatory responses? *Front Immunol*
- 1187 **8**:582. doi:10.3389/fimmu.2017.00582
- 1188 Torraca V, Masud S, Spaik HP, Meijer AH. 2014. Macrophage-pathogen interactions in infectious
- 1189 diseases: new therapeutic insights from the zebrafish host model. *Dis Model Mech* **7**:785–
- 1190 797. doi:10.1242/dmm.015594
- 1191 Torraca V, Mostowy S. 2018. Zebrafish Infection: From Pathogenesis to Cell Biology. *Trends Cell*
- 1192 *Biol* **28**:143–156. doi:10.1016/j.tcb.2017.10.002
- 1193 Travnickova J, Tran Chau V, Julien E, Mateos-Langerak J, Gonzalez C, Lelievre E, Lutfalla G, Tavian
- 1194 M, Kissa K. 2015. Primitive macrophages control HSPC mobilization and definitive
- 1195 haematopoiesis. *Nat Commun* **6**:6227. doi:10.1038/ncomms7227
- 1196 Vallochi AL, Teixeira L, Oliveira K da S, Maya-Monteiro CM, Bozza PT. 2018. Lipid Droplet, a Key
- 1197 Player in Host-Parasite Interactions. *Front Immunol* **9**:1022. doi:10.3389/fimmu.2018.01022
- 1198 White RM, Sessa A, Burke C, Bowman T, LeBlanc J, Ceol C, Bourque C, Dovey M, Goessling W,
- 1199 Burns CE, Zon LI. 2008. Transparent Adult Zebrafish as a Tool for In Vivo Transplantation
- 1200 Analysis. *Cell Stem Cell*. doi:10.1016/j.stem.2007.11.002
- 1201 Woo PTK, Ardelli BF. 2014. Immunity against selected piscine flagellates. *Dev Comp Immunol*
- 1202 **43**:268–279. doi:10.1016/j.dci.2013.07.006
- 1203 Wu H, Liu G, Shi M. 2017. Interferon gamma in African trypanosome infections: Friends or foes?
- 1204 *Front Immunol*. doi:10.3389/fimmu.2017.01105
- 1205 Wymann MP, Schneider R. 2008. Lipid signalling in disease. *Nat Rev Mol Cell Biol*.
- 1206 doi:10.1038/nrm2335
- 1207



Macrophages and neutrophils response to trypanosome infections in zebrafish

1208 **Supplementary files**

1209

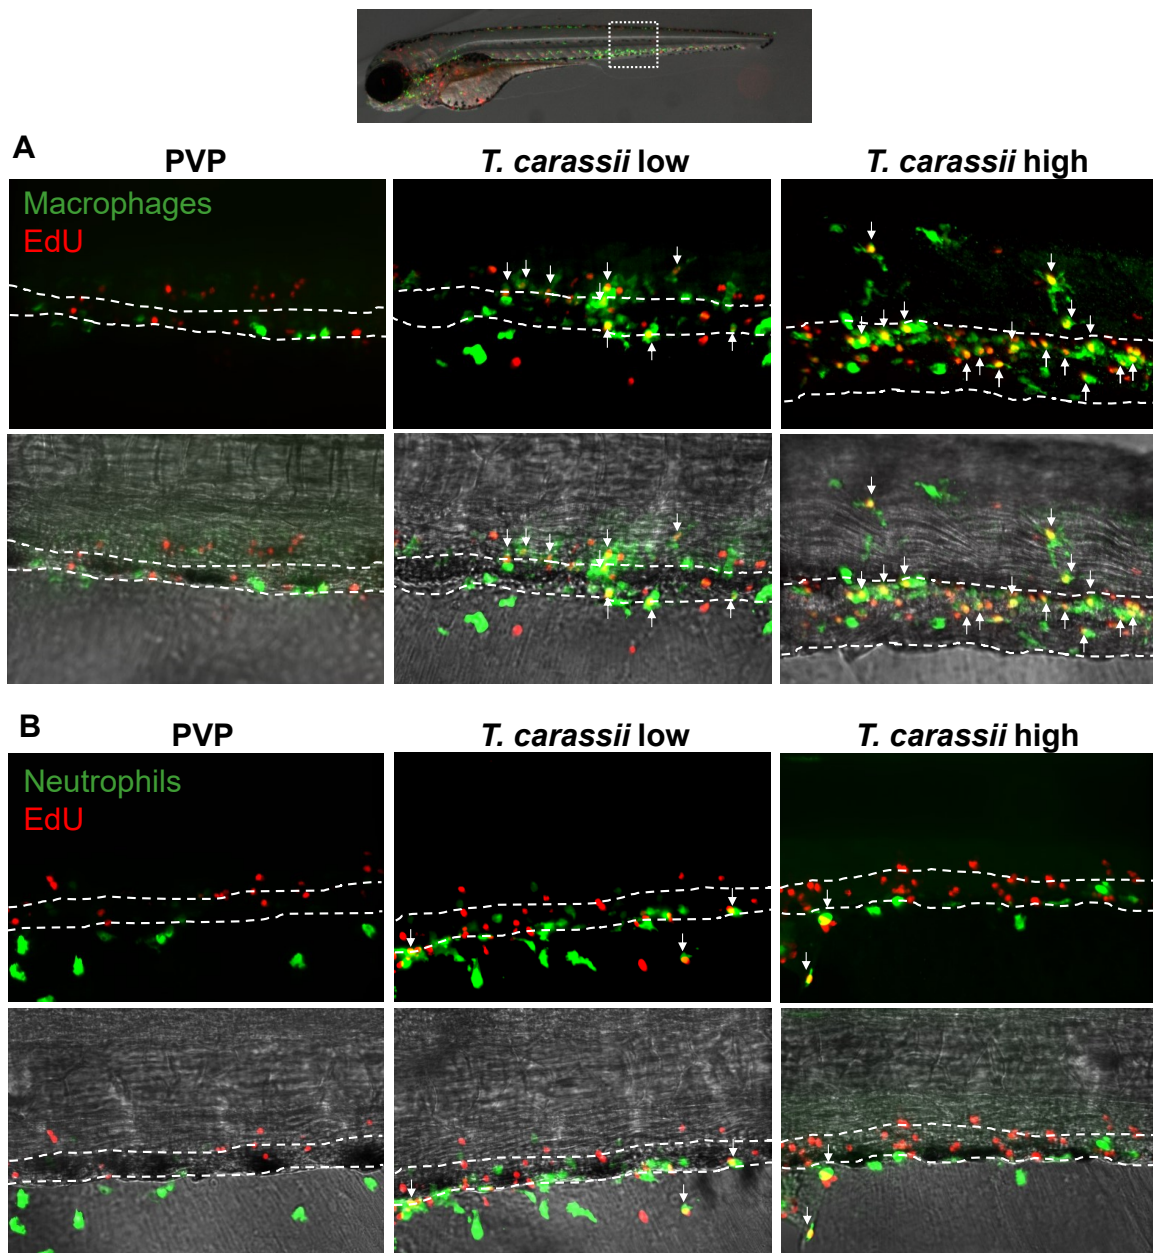

1210

1211

1212

1213

1214

1215

1216

1217

1218

**S1 Fig. Differential distribution of EdU<sup>+</sup> macrophages and neutrophils along the caudal vein of high- and low-infected larvae.** Zebrafish were treated as described in figure 5. **A)** A high number of macrophages can be seen around and inside the caudal vein. Especially in high-infected individuals, the majority of cells within the vessel was EdU<sup>+</sup>, suggesting that in these larvae, proliferating macrophages migrated to the vessels. **B)** Neutrophils were never observed within the caudal vein and, independently of whether they proliferated (EdU<sup>+</sup>) or not, were mostly observed lining the vessel.

Macrophages and neutrophils response to trypanosome infections in zebrafish

1219

Representative movie fragments of  
trypanosome detection in ISCs  
and  
trypanosome extravasation at various locations  
in high- or low-infected zebrafish larvae

**S1 Video. Clinical signs of *T. carassii* infection in high- and low-infected zebrafish larvae.** *Tg(mpeg1.4:mCherry-F;mpx:GFP)* 5 dpf zebrafish were injected with  $n=200$  *T. carassii* or with PVP and imaged at various time points after infection. Shown are high-speed videos (500 frames/sec, fps) or real-time videos (20 fps) capturing trypanosomes *in vivo* in blood or in tissues, as well as describing typical signs of anaemia and vasodilation.

Macrophages and neutrophils response to trypanosome infections in zebrafish

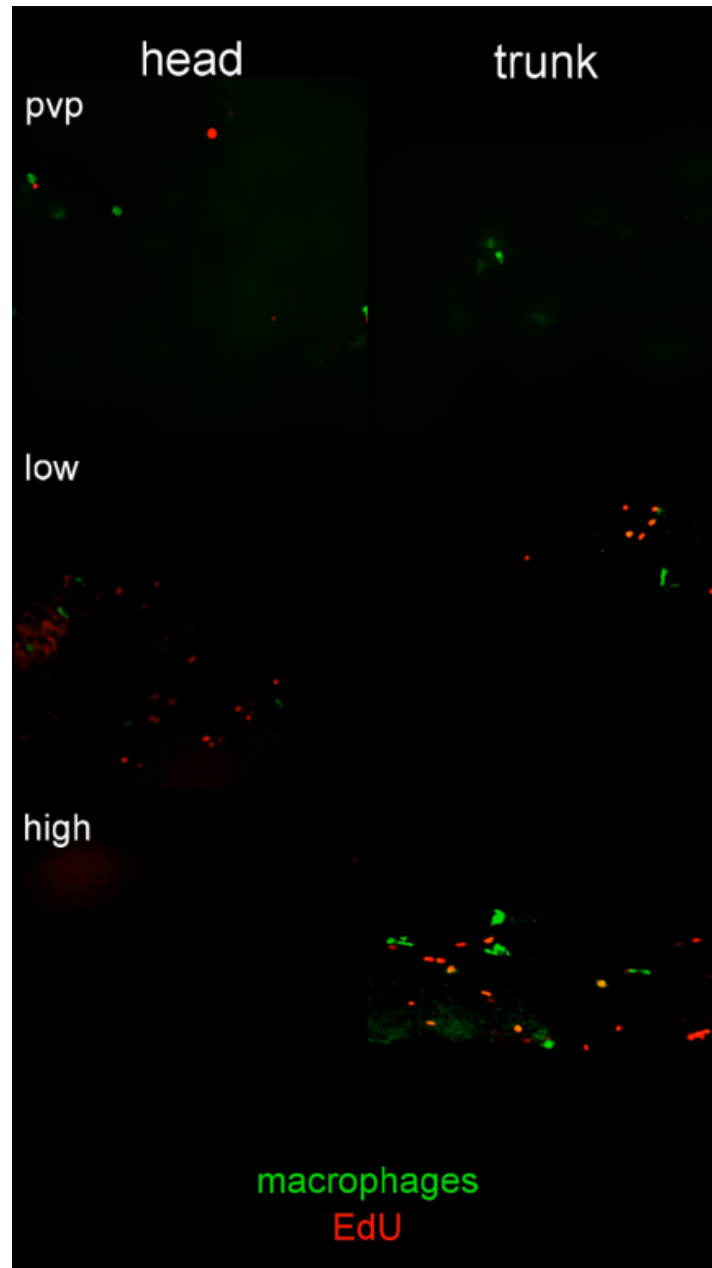

1235

1236

1237 **S2 video. *T. carassii* infection triggers macrophage proliferation.** AVI files corresponding to  
1238 the maximum projection images shown in figure 5; Arrows are positioned as in figure 5, and indicate  
1239 the location of EdU<sup>+</sup> macrophages



Macrophages and neutrophils response to trypanosome infections in zebrafish

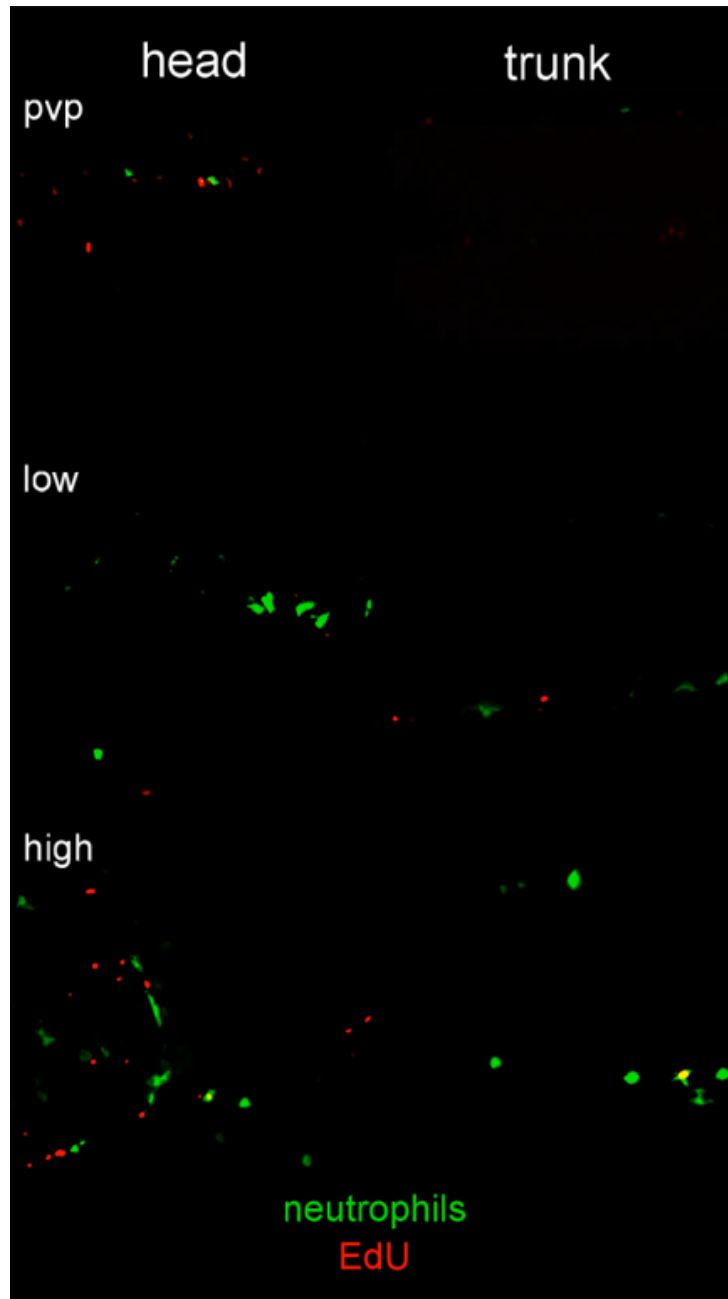

1240

1241

1242 **S3 video. *T. carassii* infection triggers neutrophils proliferation.** AVI files corresponding to the  
1243 maximum projection images shown in figure 6; Arrows are positioned as in figure 6, and indicate the  
1244 location of EdU<sup>+</sup> neutrophils

Macrophages and neutrophils response to trypanosome infections in zebrafish

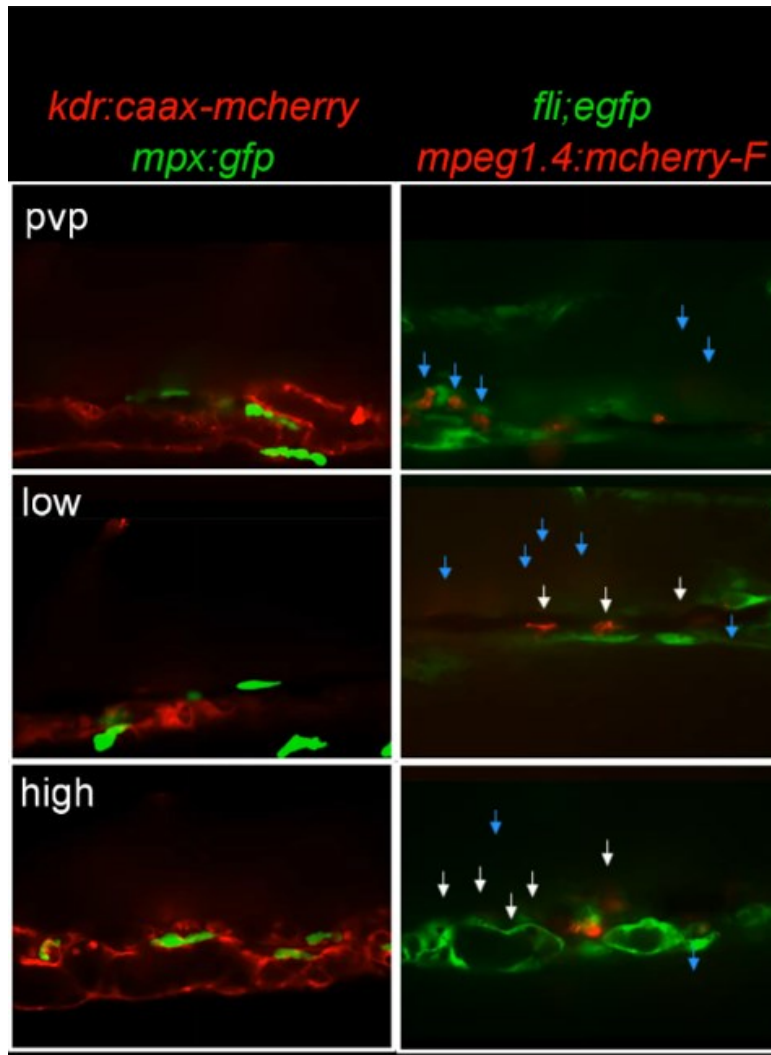

1245

1246

1247

1248

1249

1250

1251

1252

**S4 Video. Macrophages are recruited into the cardinal caudal vein of high-infected zebrafish larvae.** Zebrafish larvae were treated and imaged as described in figure 7. Shown are the AVI files corresponding to the maximum projection images shown in figure 7; Neutrophils were never observed within the vessel independently of the infection level (left panels). Macrophages however, could be seen outside (blue arrows) and inside the vessel (white arrows). The number of rounded macrophages inside the vessel increased with the infection level.

Macrophages and neutrophils response to trypanosome infections in zebrafish

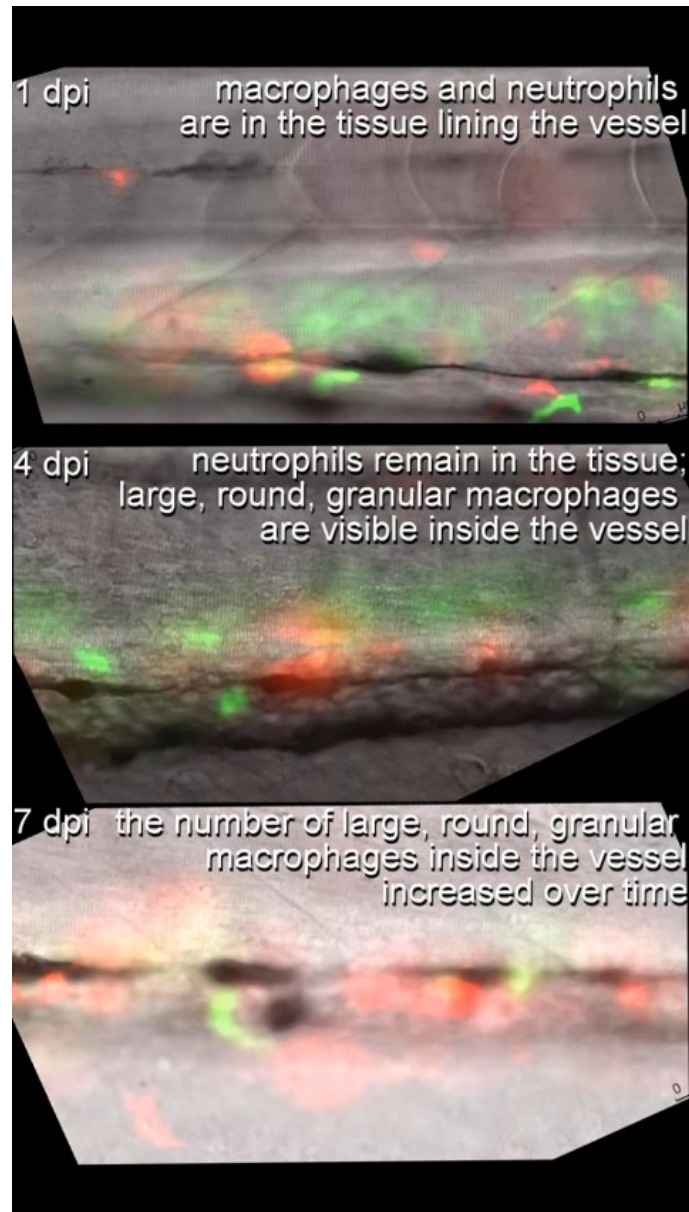

1253

1254

1255

1256 **S5 Video. The occurrence of large granular macrophages increases with the progression**

1257 **of the infection in high-infected individuals.** *Tg(mpeg1.4:mCherry-F;mpx:GFP)* zebrafish larvae

1258 were injected intravenously at 5 dpf with n=200 *T. carassii* or with PVP. At 4 dpi larvae were

1259 separated into high- and low-infected individuals and imaged at 5 dpi with a DMi8 inverted digital

1260 Leica microscope. The occurrence of large macrophages (arrows) in the cardinal caudal vessel

1261 increased with the progression of the infection and was exclusive to high infected individuals (4 and

7 dpi).

Macrophages and neutrophils response to trypanosome infections in zebrafish

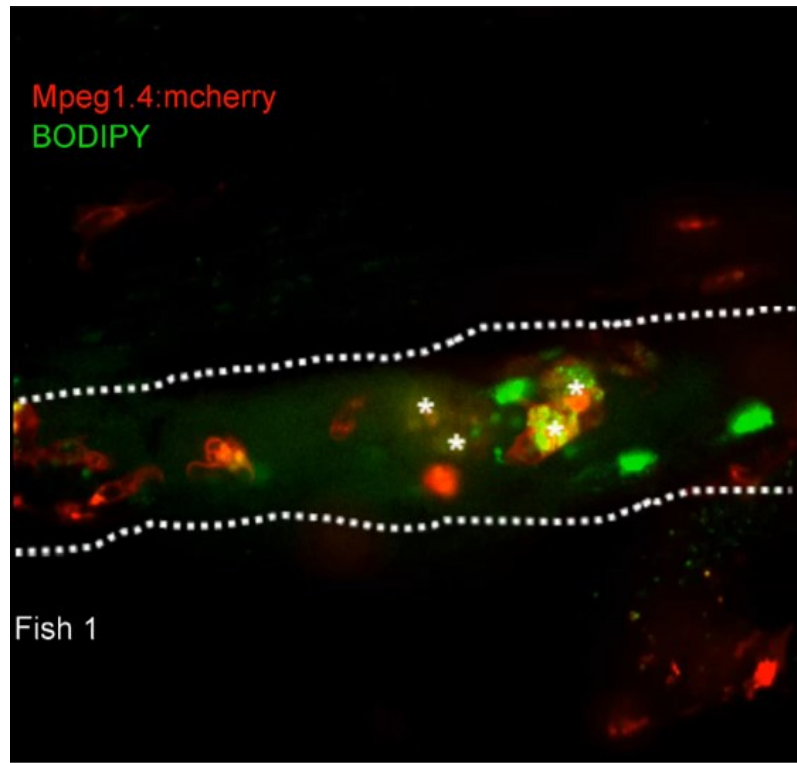

1262

1263

1264

1265

1266

1267

1268

1269

1270

**S6 Video. Large granular macrophages inside the vessel of high-infected larvae are rich in lipid bodies.** *Tg(mpeg1.4:mCherry-F)* zebrafish larvae were infected intravenously at 5 dpf with  $n=200$  *T. carassii* or with PVP. At 3 dpi, larvae received 1 nl of 30  $\mu$ M BODIPY-FLC5 and were imaged 18–20 hours later using a Roper Spinning Disc Confocal Microscope at a 40x magnification. The AVI files corresponding to the maximum projection images shown in figure 8, as well as a second individual, are shown. Asterisks indicate the position of foamy macrophages inside the caudal vessel (dashed line).
